# Supplementary material for: The Volatile Phytochemistry of Seven Native American Aromatic Medicinal Plants
Source: MDPI journal article supplement (doi:10.3390/plants10061061), 2021-05-25
Supplement: s1 [file s1]

Supplementary Table S1. Enantiomeric distribution of terpenoids in Asteraceae species.

| Compound                             | <i>Heliopsis<br/>helianthoides</i> | <i>Liatris<br/>spicata</i> | <i>Smallanthus<br/>vedalia</i> | <i>Achillea<br/>ligustica</i> | <i>Erechtites<br/>hieracifolia</i> | <i>Solidago<br/>canadensis</i> | <i>Coreopsis<br/>triloba</i> | <i>Baccharis tridentata</i><br>Vahl |           |
|--------------------------------------|------------------------------------|----------------------------|--------------------------------|-------------------------------|------------------------------------|--------------------------------|------------------------------|-------------------------------------|-----------|
|                                      |                                    | this work                  |                                | [1]                           | [2]                                | [3]                            | [4]                          | male                                | female    |
|                                      |                                    |                            |                                |                               |                                    |                                |                              | [5]                                 |           |
| $\alpha$ -Thujene                    | ---                                | ---                        | 19.1:80.9                      | ---                           | ---                                | ---                            | ---                          | 3:97                                | 5:95      |
| $\alpha$ -Pinene                     | ---                                | 17.1:82.9                  | 6.7:93.3                       | 59:41                         | 100:0                              | 74:26                          | 18.4:81.6                    | 15.3:84.7                           | 16:84     |
| Camphene                             | ---                                | 100:0                      | 100:0                          | 78:22                         | ---                                | ---                            | ---                          | 4:96                                | 3:97      |
| Sabinene                             | ---                                | ---                        | 8.5:91.5                       | ---                           | ---                                | ---                            | ---                          | 23:77                               | 24:76     |
| $\beta$ -Pinene                      | ---                                | 52.3:47.7                  | 30.7:69.3                      | 2:98                          | 10.3:89.7                          | 36:64                          | 100:0                        | 73:27                               | 73:27     |
| Limonene                             | ---                                | 33.4:66.6                  | 95.2:4.8                       | ---                           | 0:100                              | 98:2                           | 2.5:97.5                     | 66.3:33.7                           | 66.0:34.0 |
| $\beta$ -Phellandrene                | ---                                | ---                        | 100:0                          | ---                           | ---                                | ---                            | ---                          | ---                                 | ---       |
| <i>cis</i> -Sabinene hydrate         | ---                                | ---                        | 0:100                          | ---                           | ---                                | ---                            | ---                          | ---                                 | ---       |
| Linalool                             | ---                                | 52.9:47.1                  | ---                            | ---                           | 75.9:24.1                          | ---                            | ---                          | ---                                 | ---       |
| <i>trans</i> -Sabinene hydrate       | ---                                | ---                        | 0:100                          | ---                           | ---                                | ---                            | ---                          | ---                                 | ---       |
| Borneol                              | ---                                | 0:100                      | ---                            | 27:73                         | ---                                | ---                            | ---                          | ---                                 | ---       |
| Terpinen-4-ol                        | ---                                | 0:100                      | 28.8:71.2                      | 56:44                         | ---                                | ---                            | ---                          | ---                                 | ---       |
| $\alpha$ -Terpineol                  | ---                                | ---                        | 34.5:65.5                      | ---                           | ---                                | ---                            | ---                          | ---                                 | ---       |
| Verbenone                            | ---                                | 0:100                      | 91.1:8.9                       | ---                           | ---                                | ---                            | ---                          | ---                                 | ---       |
| Bornyl acetate                       | ---                                | 0:100                      | ---                            | ---                           | ---                                | 0:100                          | ---                          | ---                                 | ---       |
| $\alpha$ -Copaene                    | ---                                | ---                        | 100:0                          | ---                           | ---                                | ---                            | ---                          | ---                                 | ---       |
| $\delta$ -Elemene                    | 50.0:50.0                          | ---                        | ---                            | ---                           | ---                                | ---                            | ---                          | ---                                 | ---       |
| <i>trans</i> - $\beta$ -Elemene      | 100:0                              | ---                        | 17.1:82.9                      | ---                           | ---                                | ---                            | ---                          | ---                                 | ---       |
| ( <i>E</i> )- $\beta$ -Caryophyllene | 100:0                              | 100:0                      | 100:0                          | ---                           | ---                                | ---                            | ---                          | ---                                 | ---       |
| ( <i>E</i> )- $\beta$ -Ionone        | 100:0                              | ---                        | ---                            | ---                           | ---                                | ---                            | ---                          | ---                                 | ---       |
| Germacrene D                         | 89.3:10.7                          | 100:0                      | 96.4:3.6                       | ---                           | ---                                | 71:29                          | 0:100                        | ---                                 | ---       |
| $\delta$ -Cadinene                   | 0:100                              | 0:100                      | 0:100                          | ---                           | ---                                | ---                            | ---                          | ---                                 | ---       |
| ( <i>E</i> )-Nerolidol               | 0:100                              | 0:100                      | 34.1:65.9                      | ---                           | ---                                | ---                            | ---                          | ---                                 | ---       |

1. Filippi, J.-J.; Lanfranchi, D.-A.; Prado, S.; Baldovini, N.; Meierhenrich, U.J. Composition, enantiomeric distribution, and antibacterial activity of the essential oil of *Achillea ligustica* All. from Corsica. *J. Agric. Food Chem.* **2006**, *54*, 6308–6313,

doi:10.1021/jf060752y.

2. Lorenzo, D.; Saavedra, G.; Loayza, I.; Dellacassa, E. Composition of the essential oil of *Erechtites hieracifolia* from Bolivia. *Flavour Fragr. J.* **2001**, *16*, 353–355, doi:10.1002/ffj.1010.
3. Chanotiya, C.S.; Yadav, A. Natural variability in enantiomeric composition of bioactive chiral terpenoids in the essential oil of *Solidago canadensis* L. from Uttarakhand, India. *Nat. Prod. Commun.* **2008**, *3*, 263–266.
4. Espinosa, S.; Bec, N.; Larroque, C.; Ramírez, J.; Sgorbini, B.; Bicchi, C.; Gilardoni, G. Chemical, enantioselective, and sensory analysis of a cholinesterase inhibitor essential oil from *Coreopsis triloba* S.F. Blake (Asteraceae). *Plants* **2019**, *8*, 448, doi:10.3390/plants8110448.
5. Minteguiaga, M.; Fariña, L.; Cassel, E.; Fiedler, S.; Catalán, C.A.N.; Dellacassa, E. Chemical compositions of essential oil from the aerial parts of male and female plants of *Baccharis tridentata* Vahl. (Asteraceae). *J. Essent. Oil Res.* **2021**, in press, doi:10.1080/10412905.2020.1829720.
