# Supplementary material for: The Volatile Phytochemistry of Seven Native American Aromatic Medicinal Plants
Source: Plants (Basel). 2021 May 25;10(6):1061. doi: 10.3390/plants10061061 (PMC8229852; doi:10.3390/plants10061061)
Supplement: Supplementary file 1 [file plants-10-01061-s001.zip]

Archive with 8 entries (8 files):
- Figure_S1_A_foeniculum_chiral_GC-MS.pdf
- Figure_S2_G_procumbens_chiral_GC-MS.pdf
- Figure_S3_H_helianthoides_chiral_GC-MS.pdf
- Figure_S4_L_spicata_chiral_GC-MS.pdf
- Figure_S5_P_incanum_chiral_GC-MS.pdf
- Figure_S6_S_uvedalia_chiral_GC-MS.pdf
- Figure_S7_V_hastata_chiral_GC-MS.pdf
- Supplementary Table S1.pdf
