# Supplementary figures and images for: The Volatile Phytochemistry of Seven Native American Aromatic Medicinal Plants
Source: MDPI journal article supplement (doi:10.3390/plants10061061), 2021-05-25

**Supplementary Figure S7.** Chiral gas chromatogram of *Verbena hastata* essential oil.

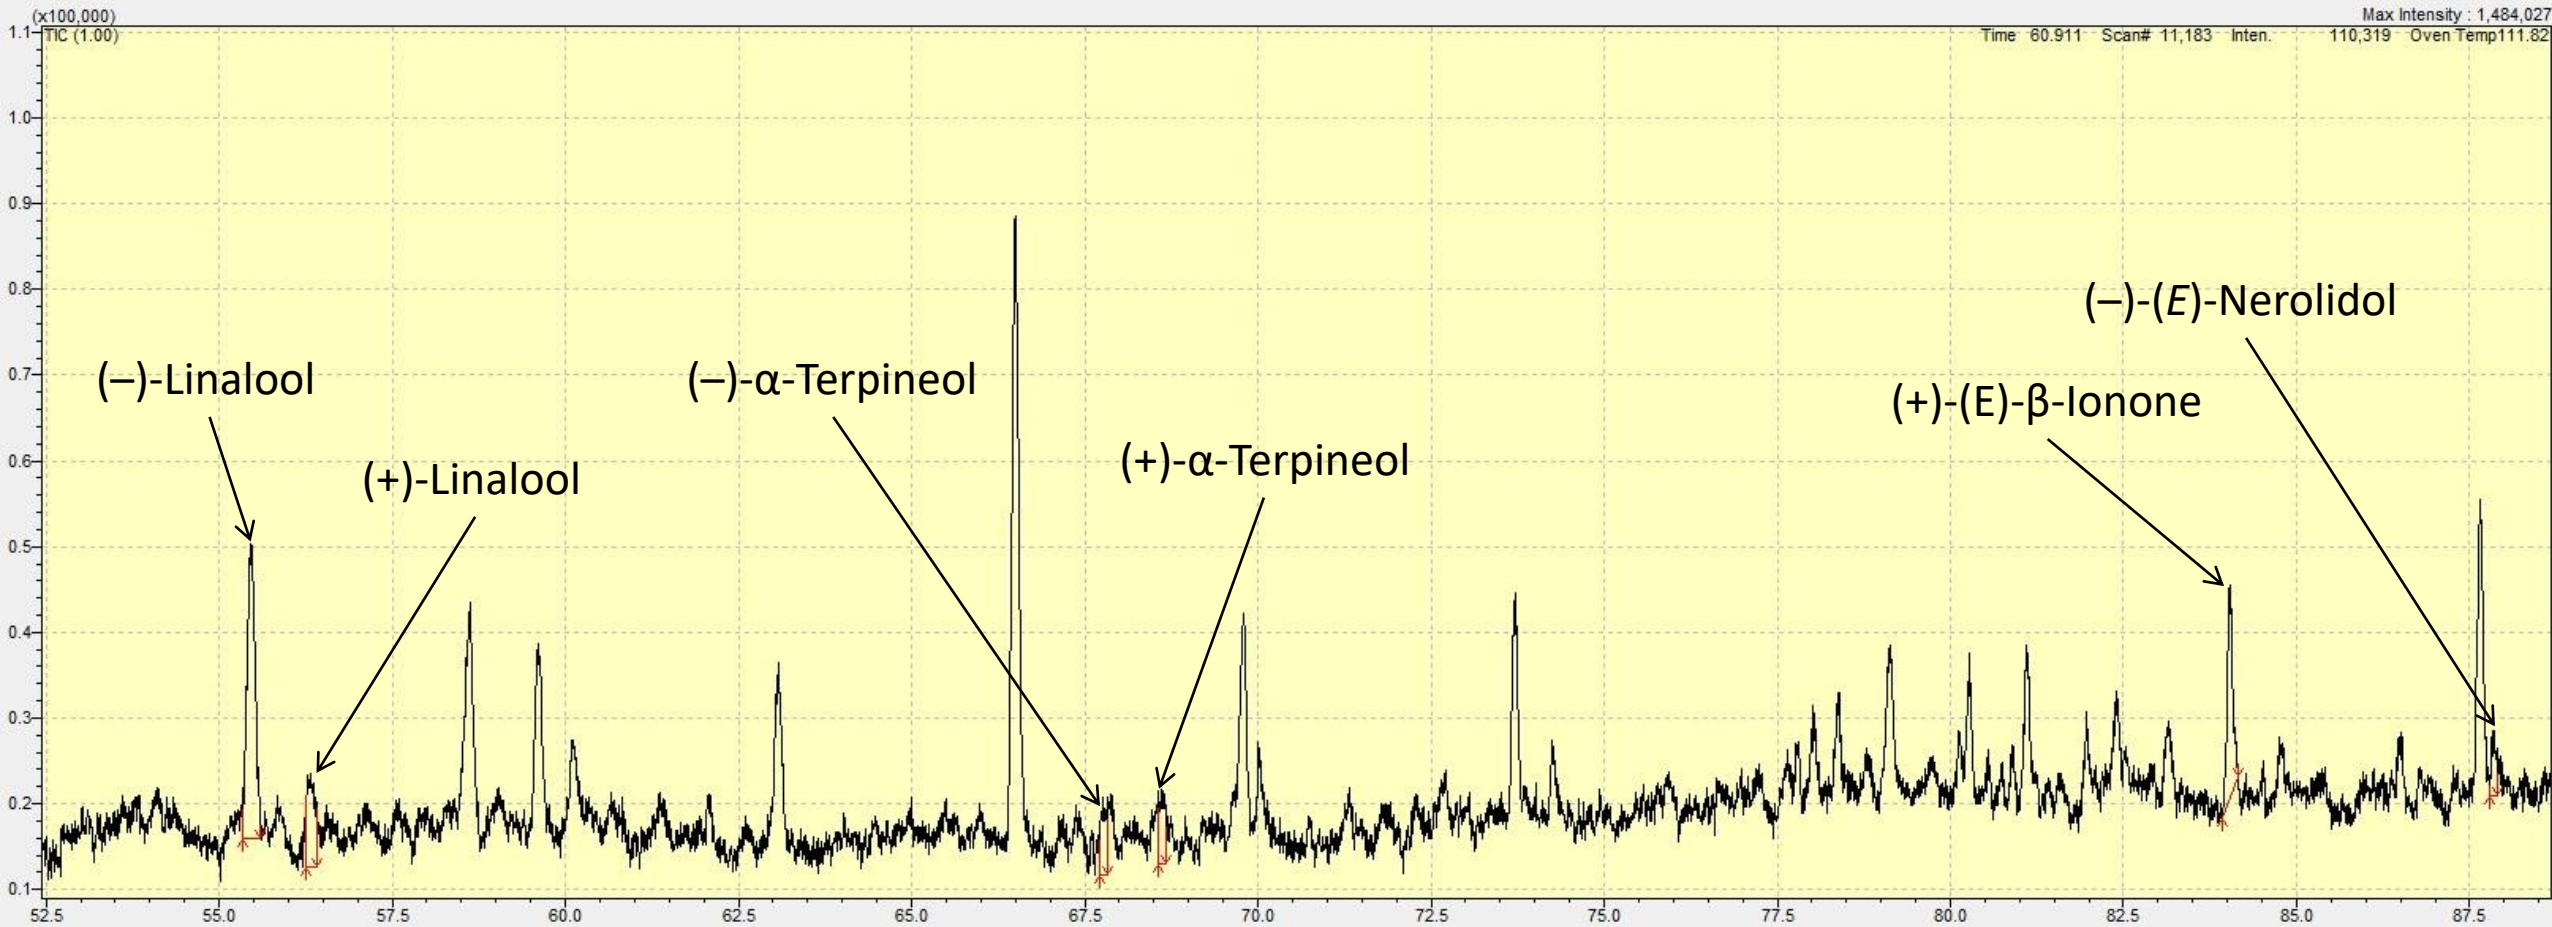

Supplement: s1 [file s1]

**Supplementary Figure S1.** Chiral gas chromatogram of *Agastache foeniculum* essential oil.

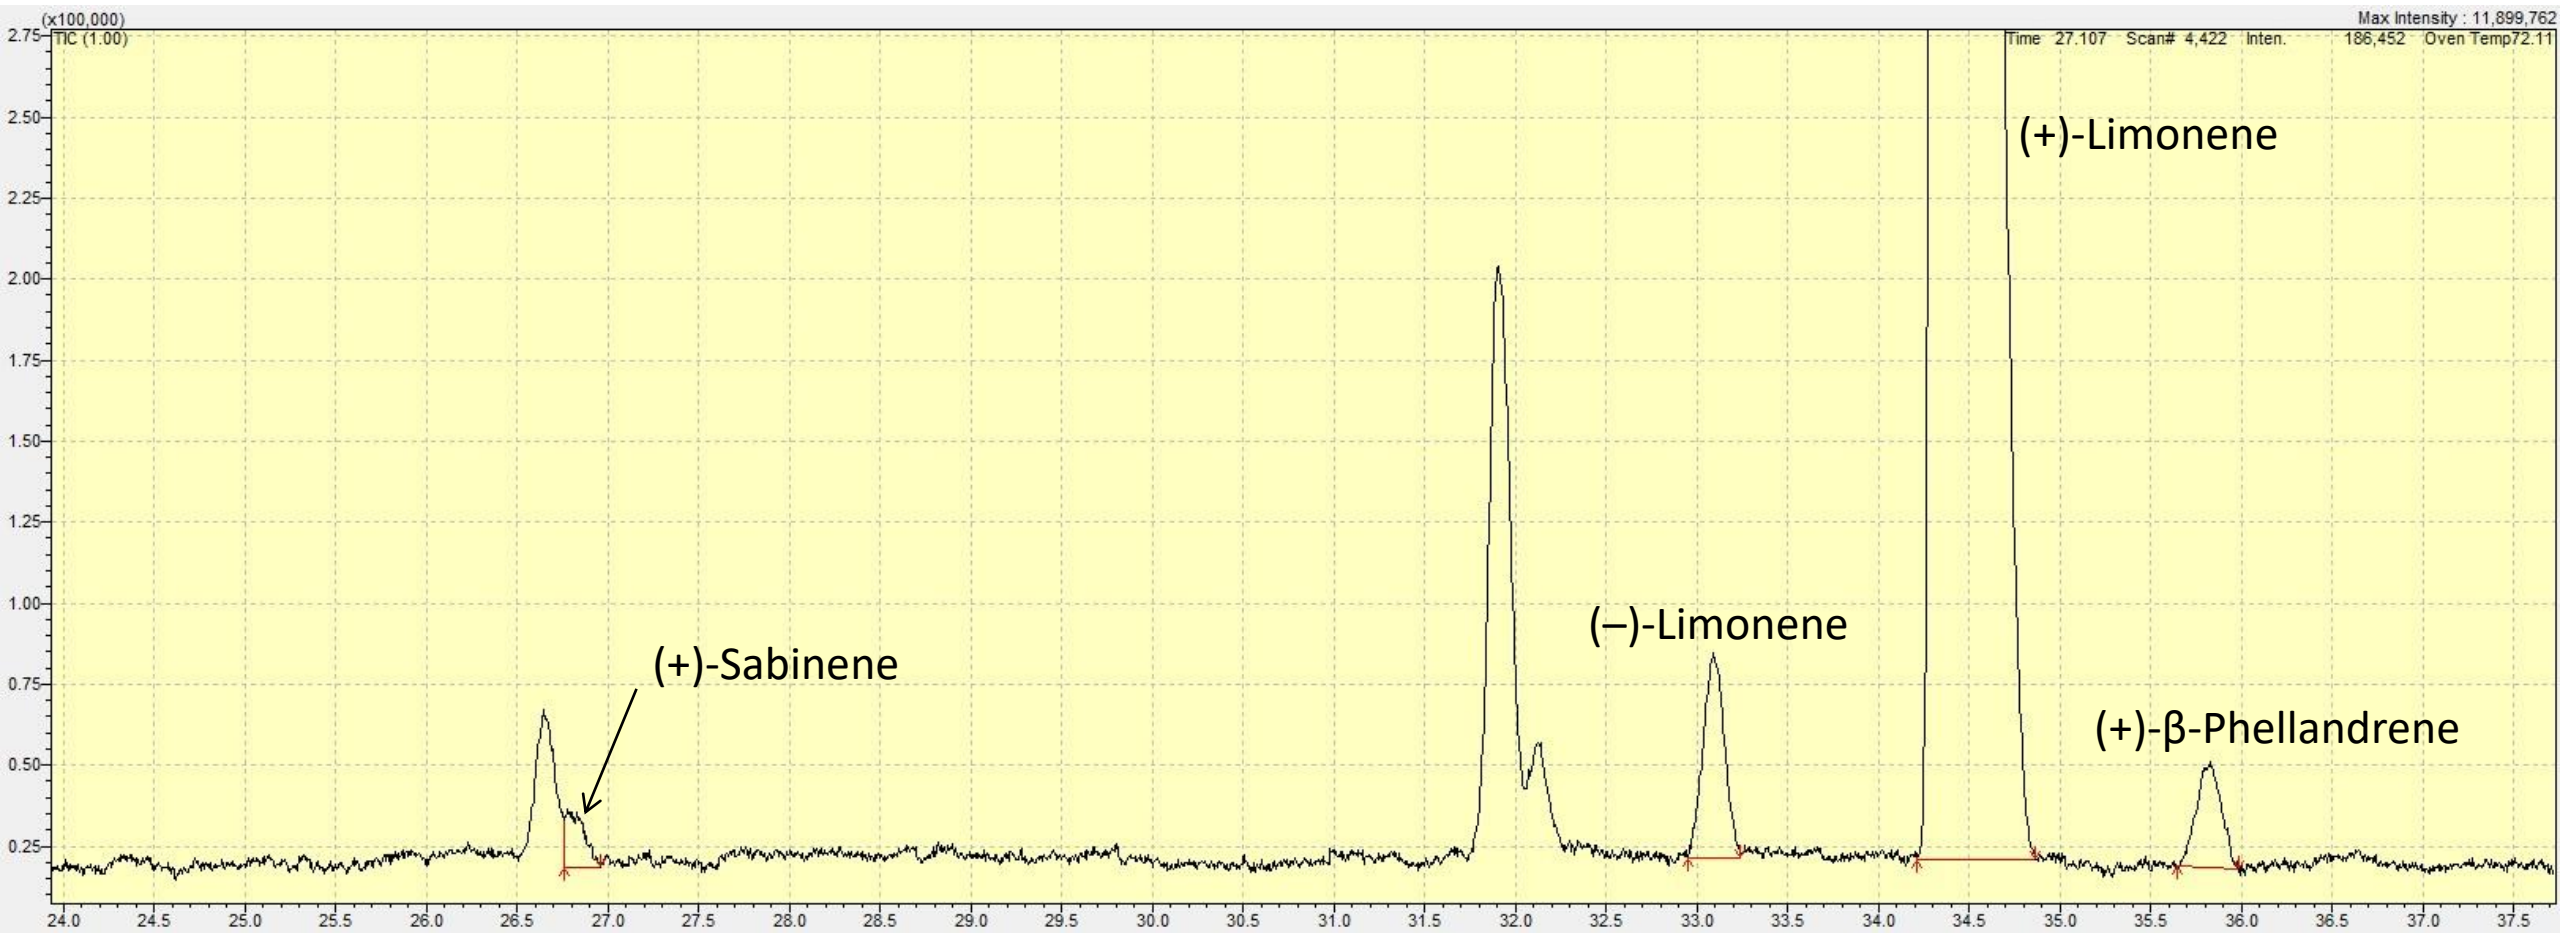

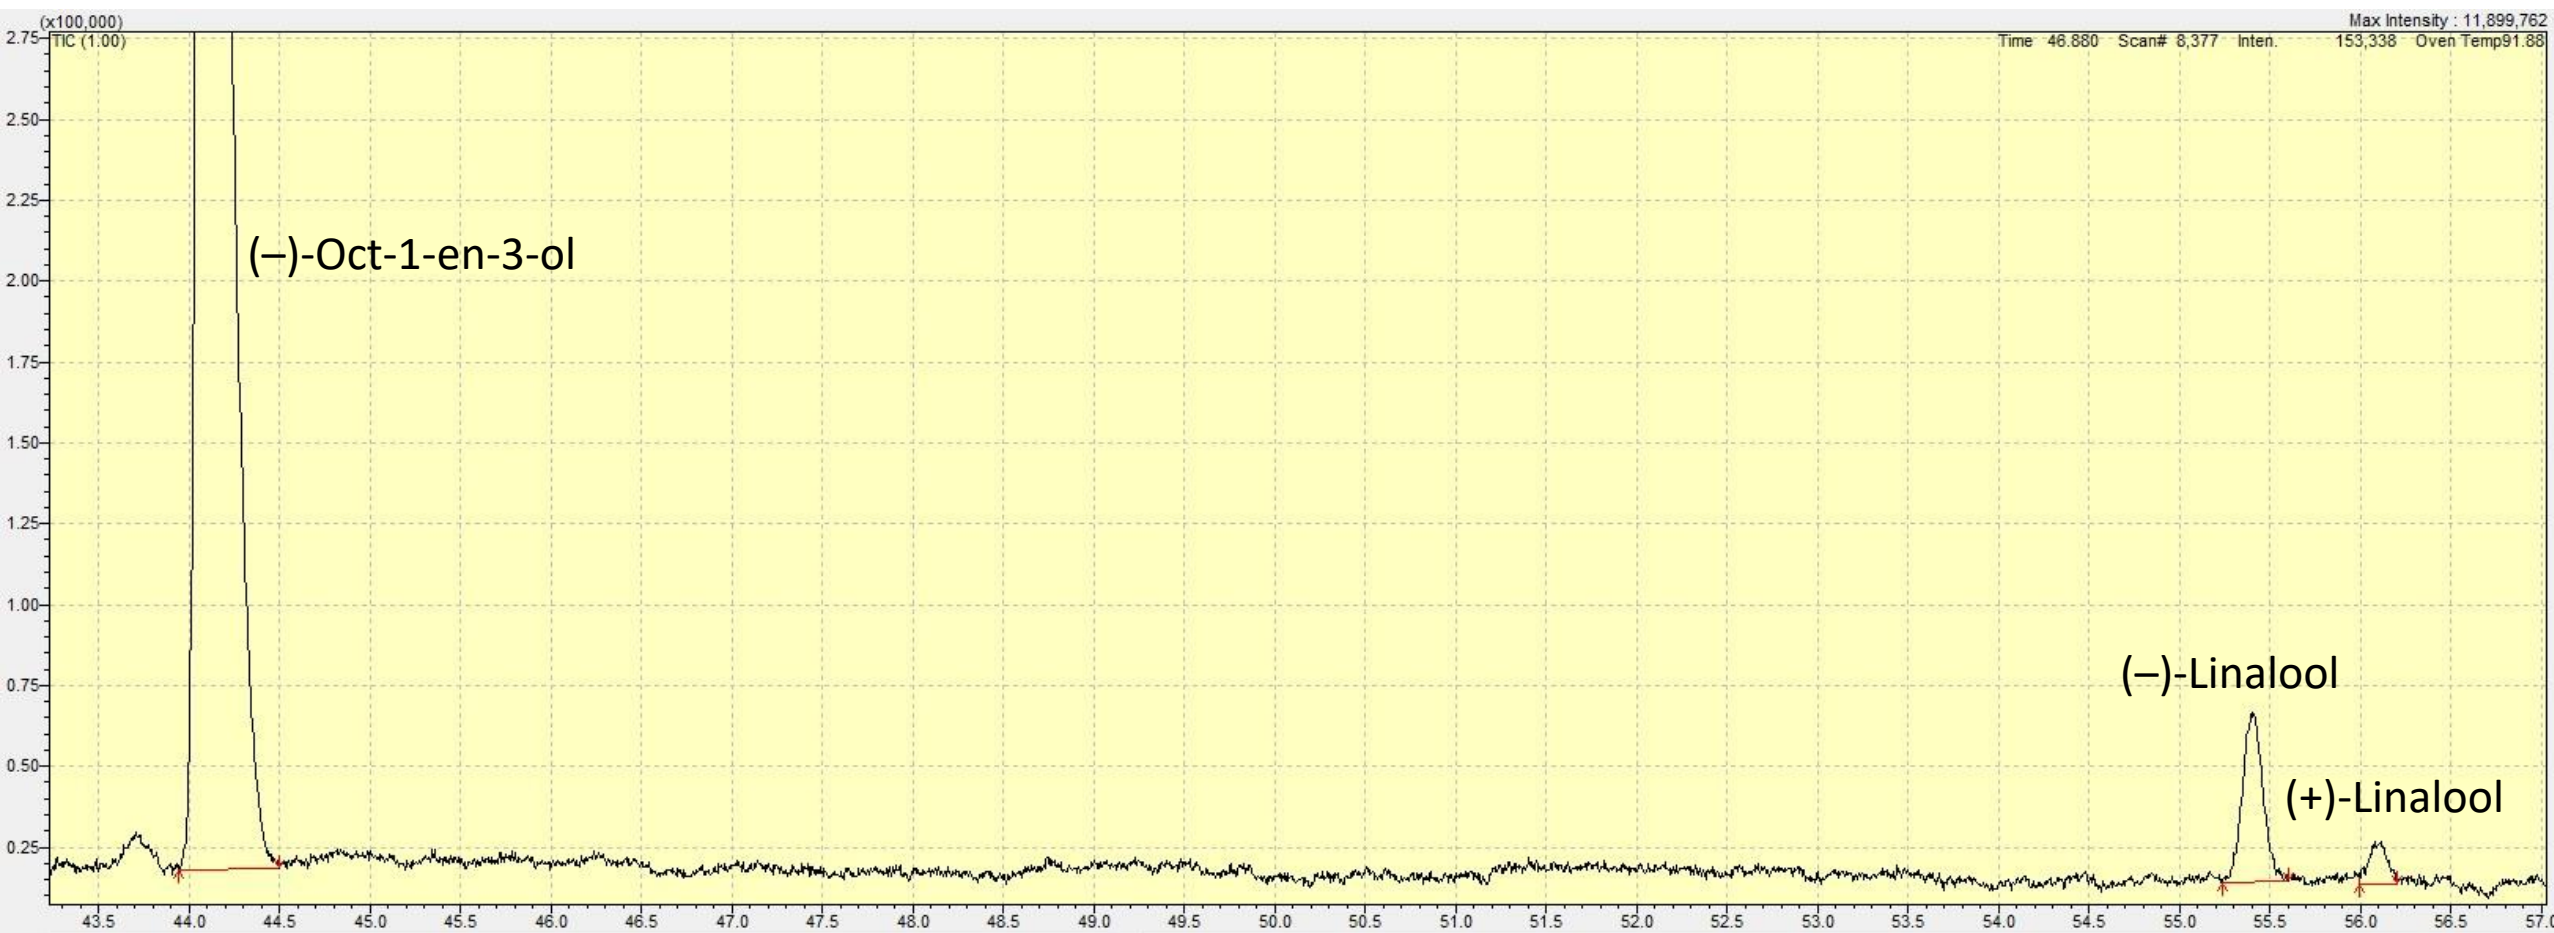

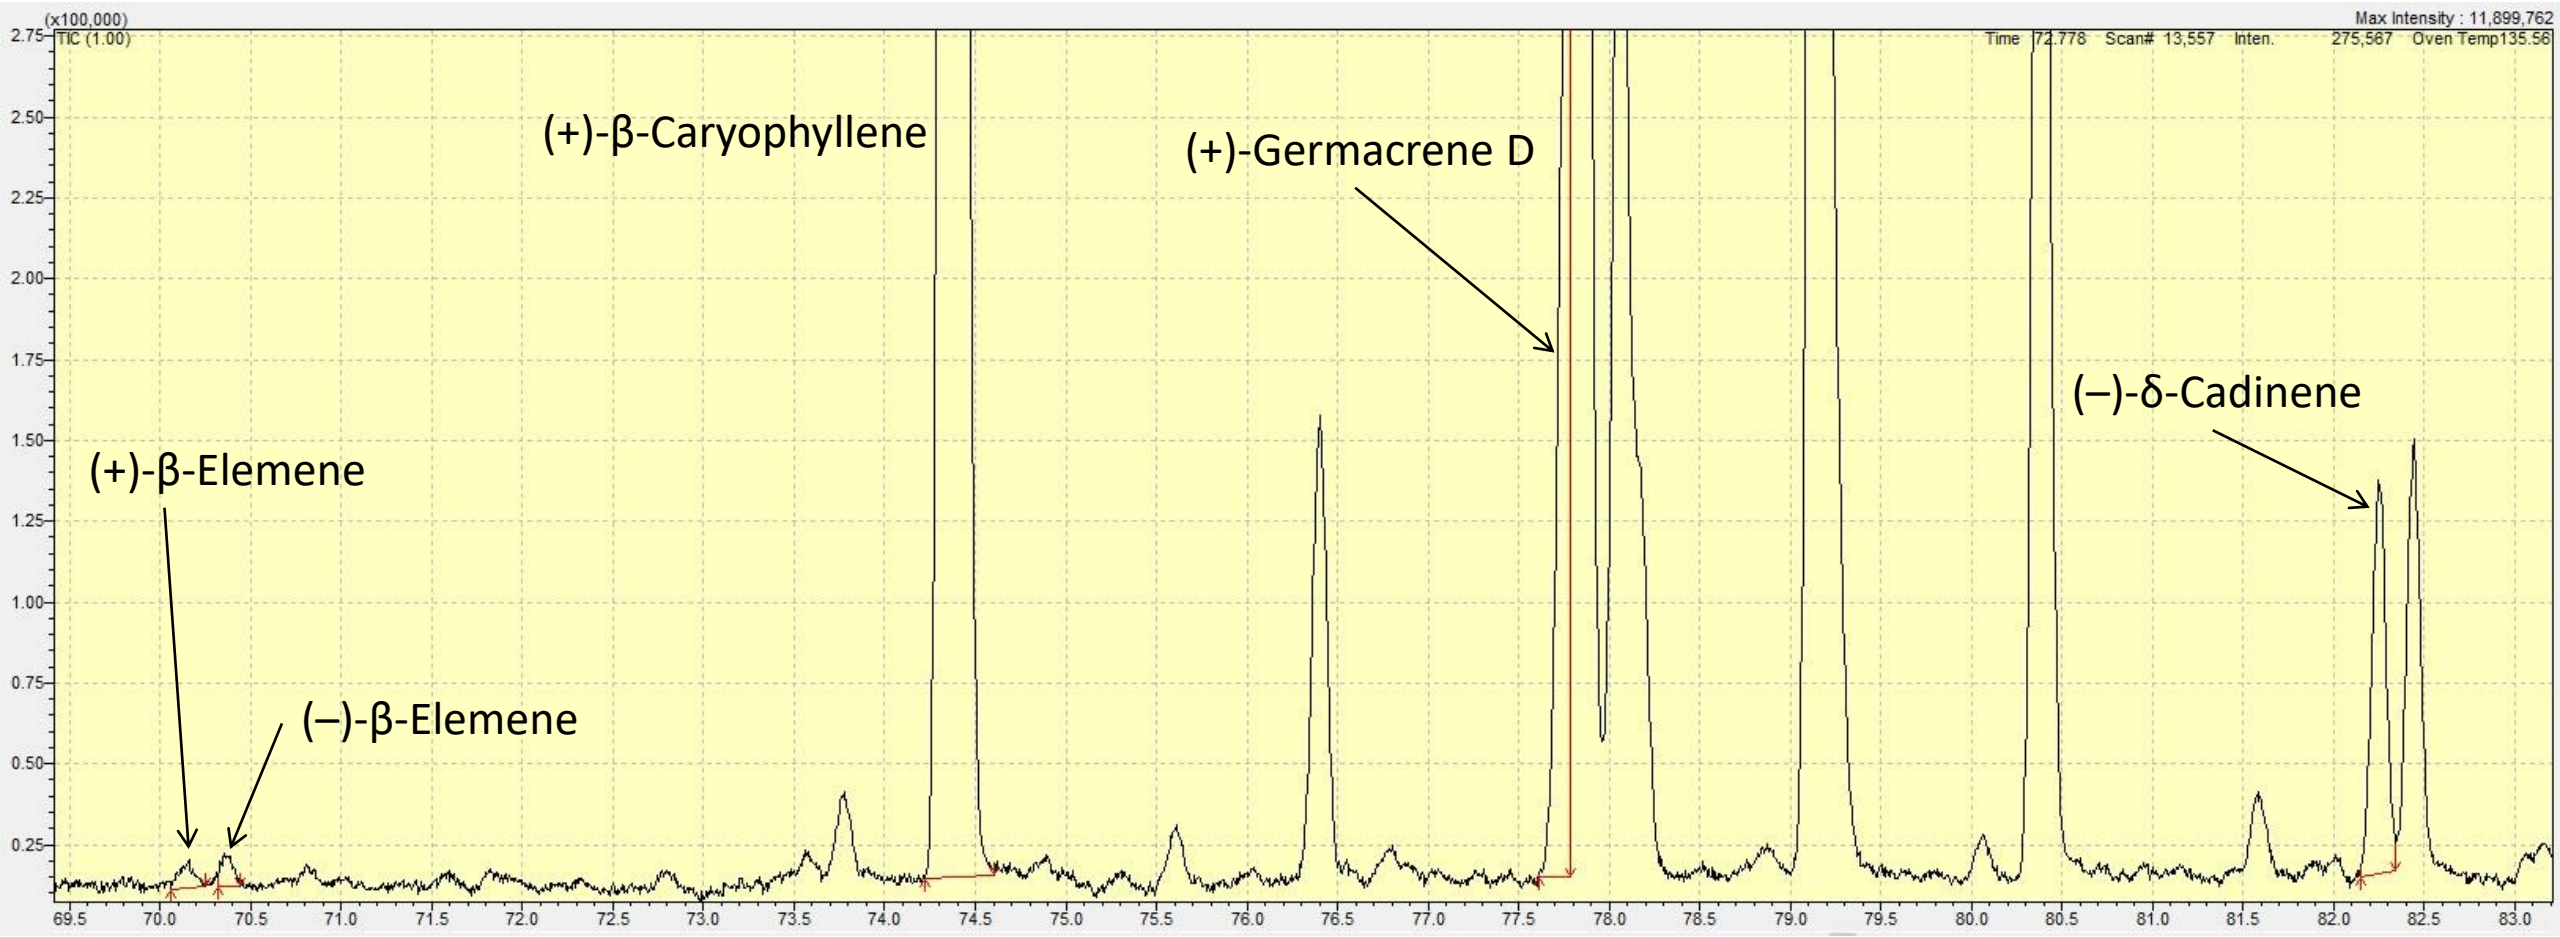

Supplement: s1 [file s1]

**Supplementary Figure S5.** Chiral gas chromatogram of *Pycnanthemum incanum* essential oil.

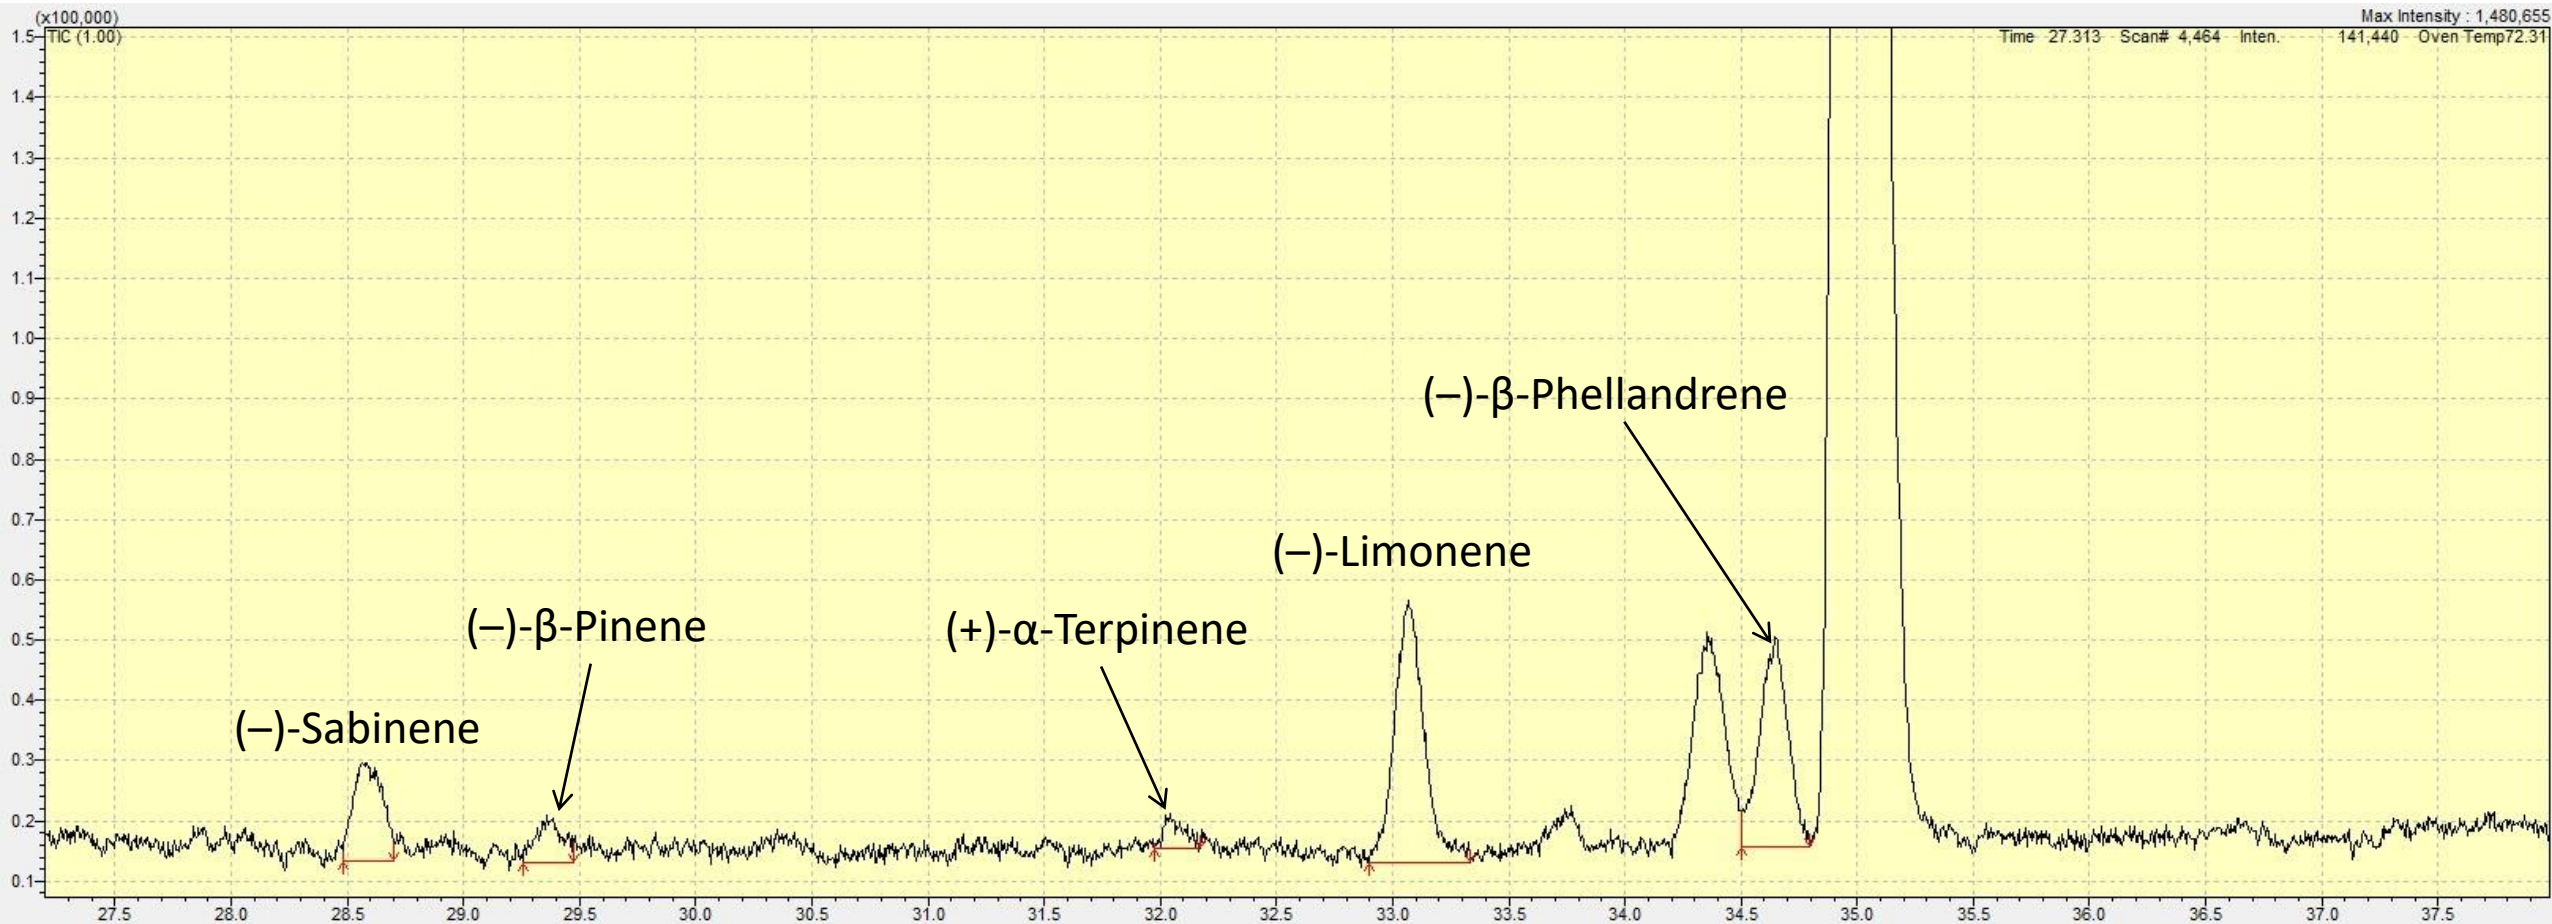

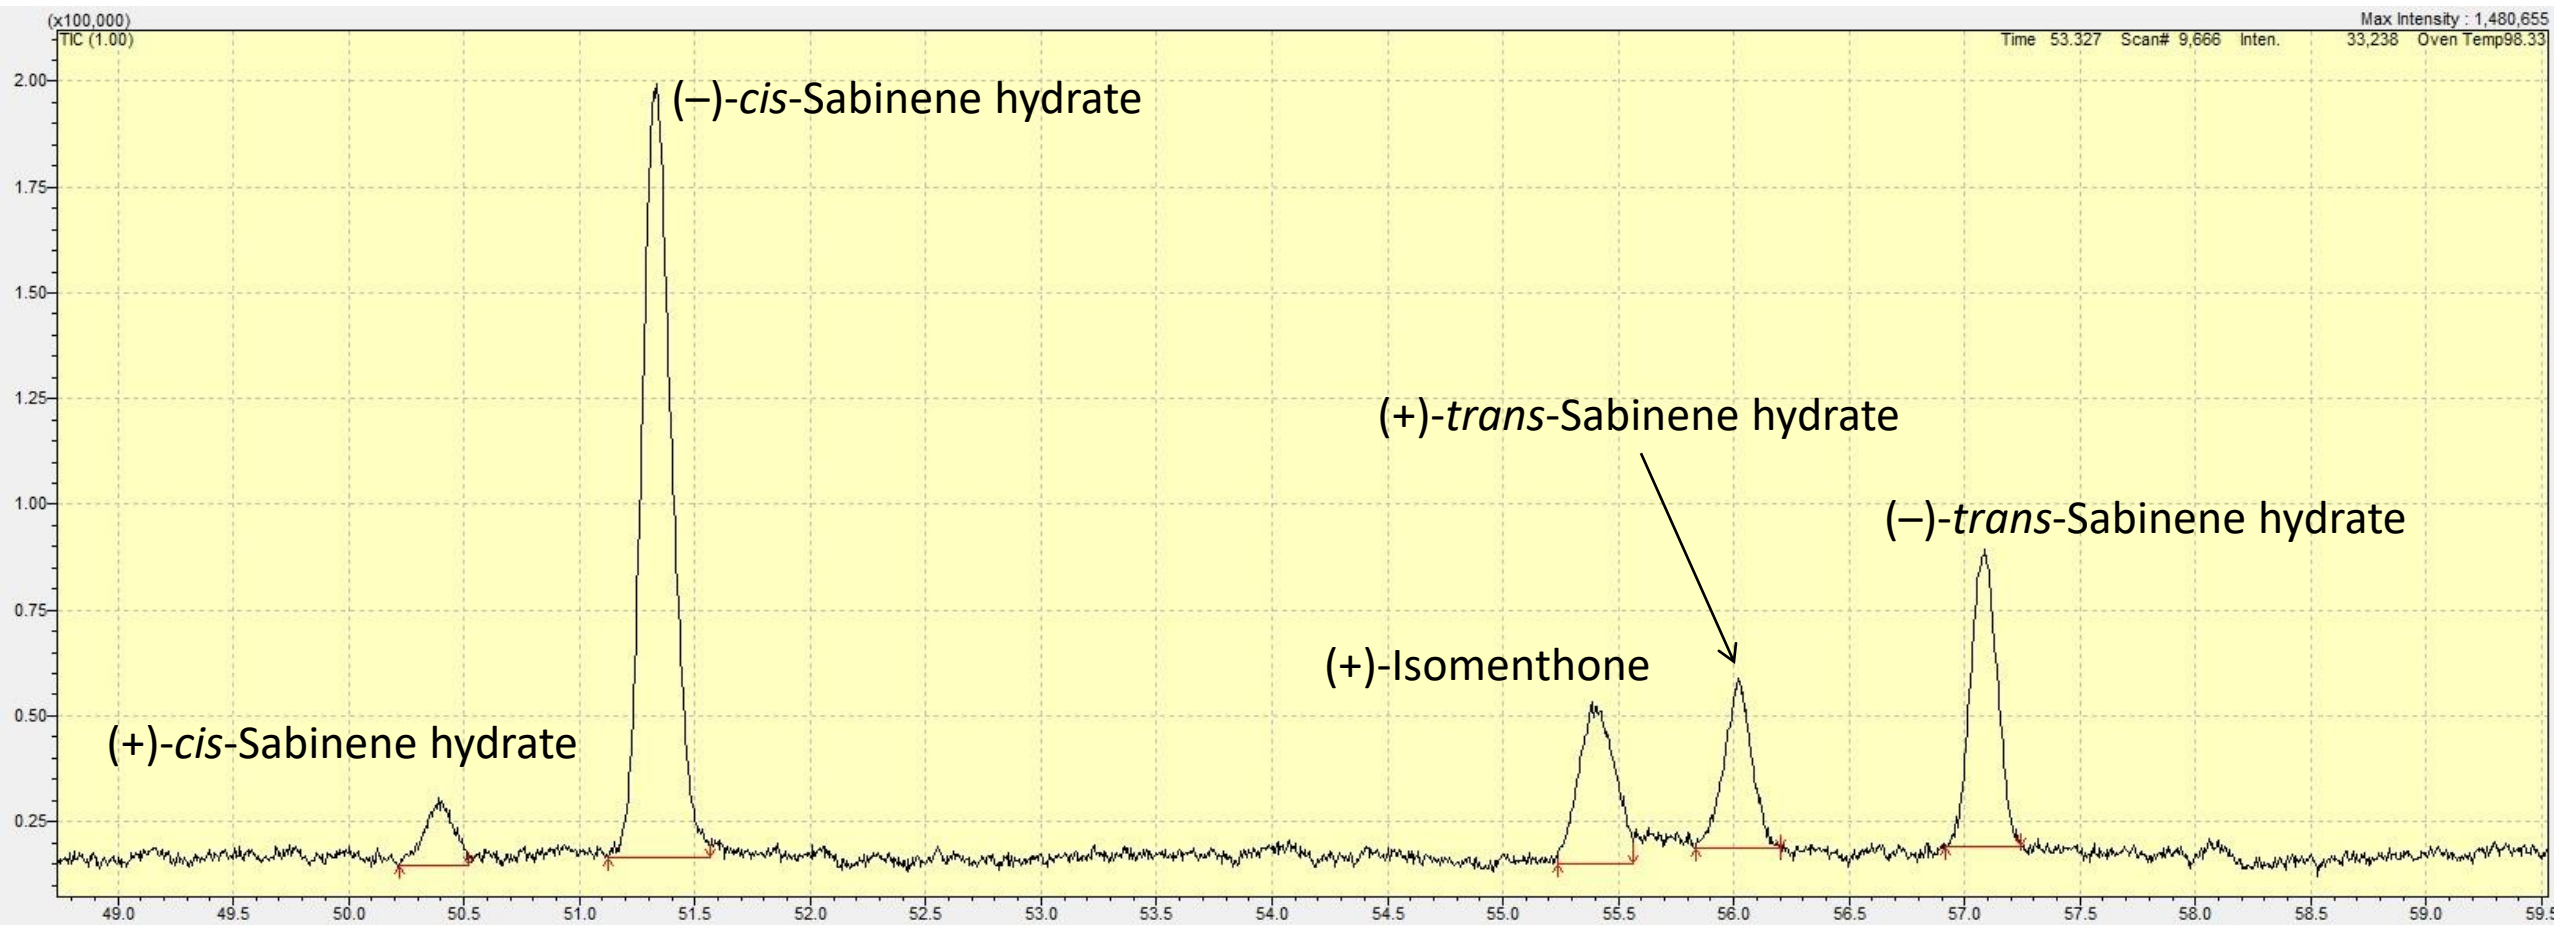

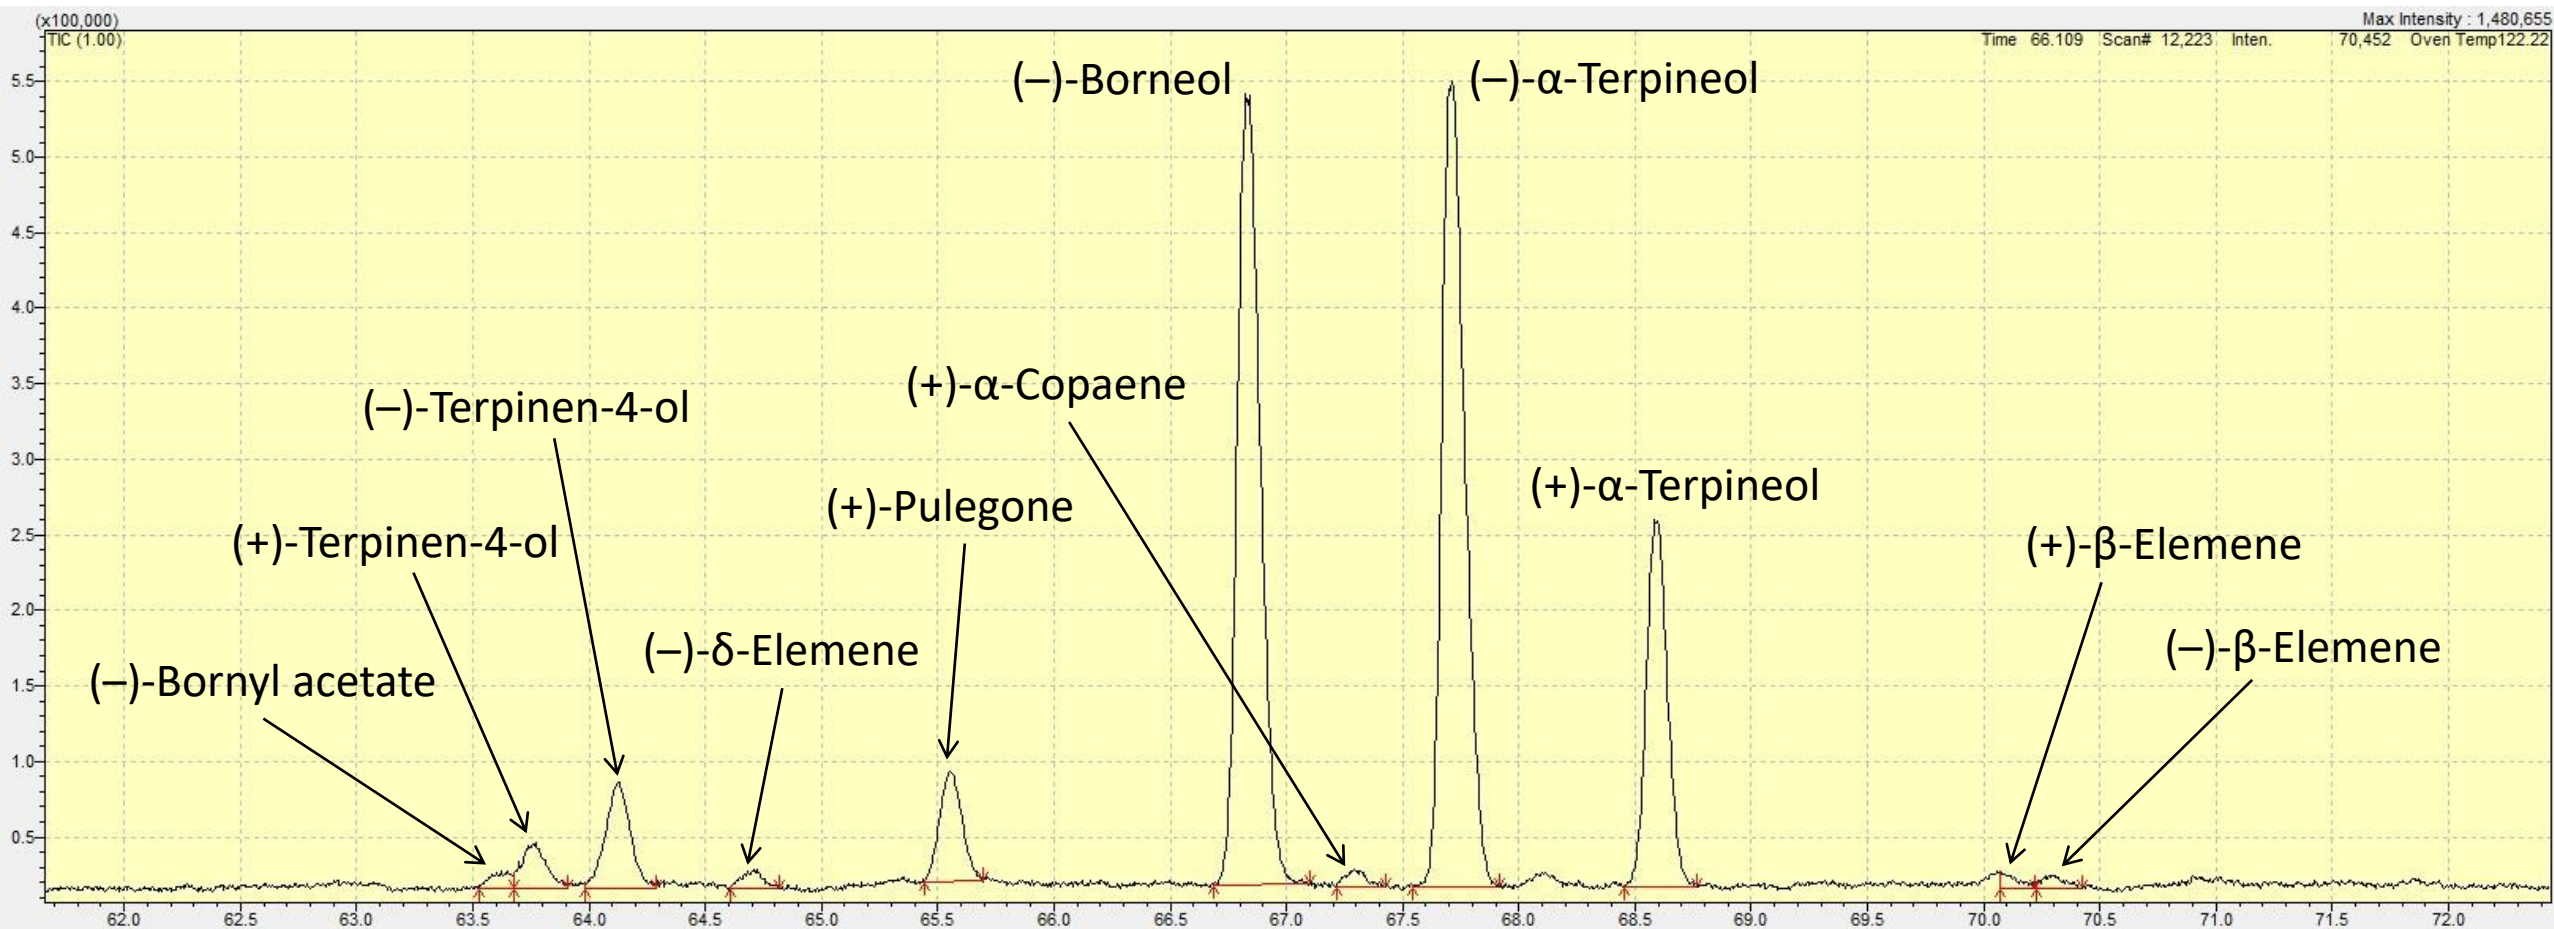



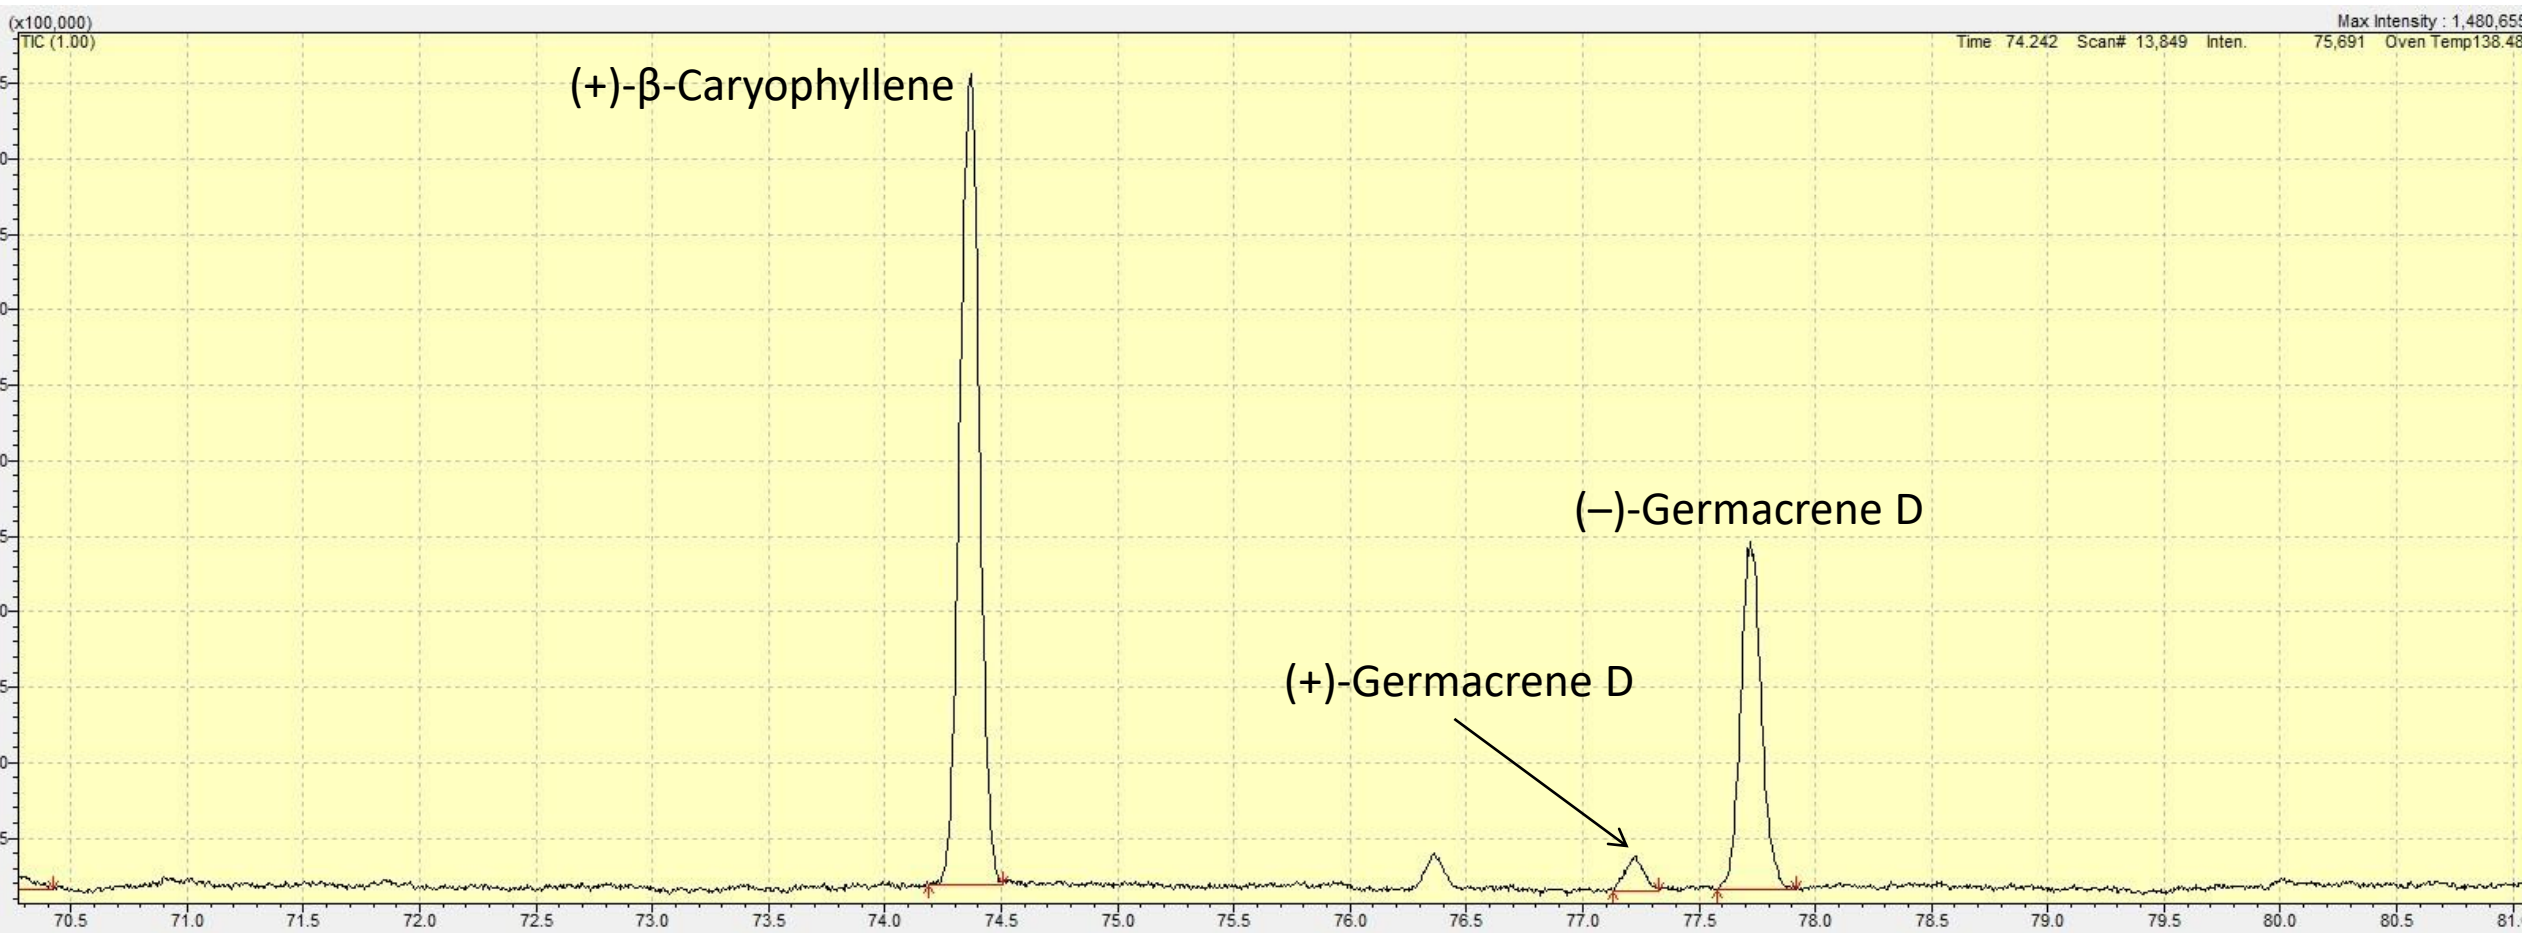

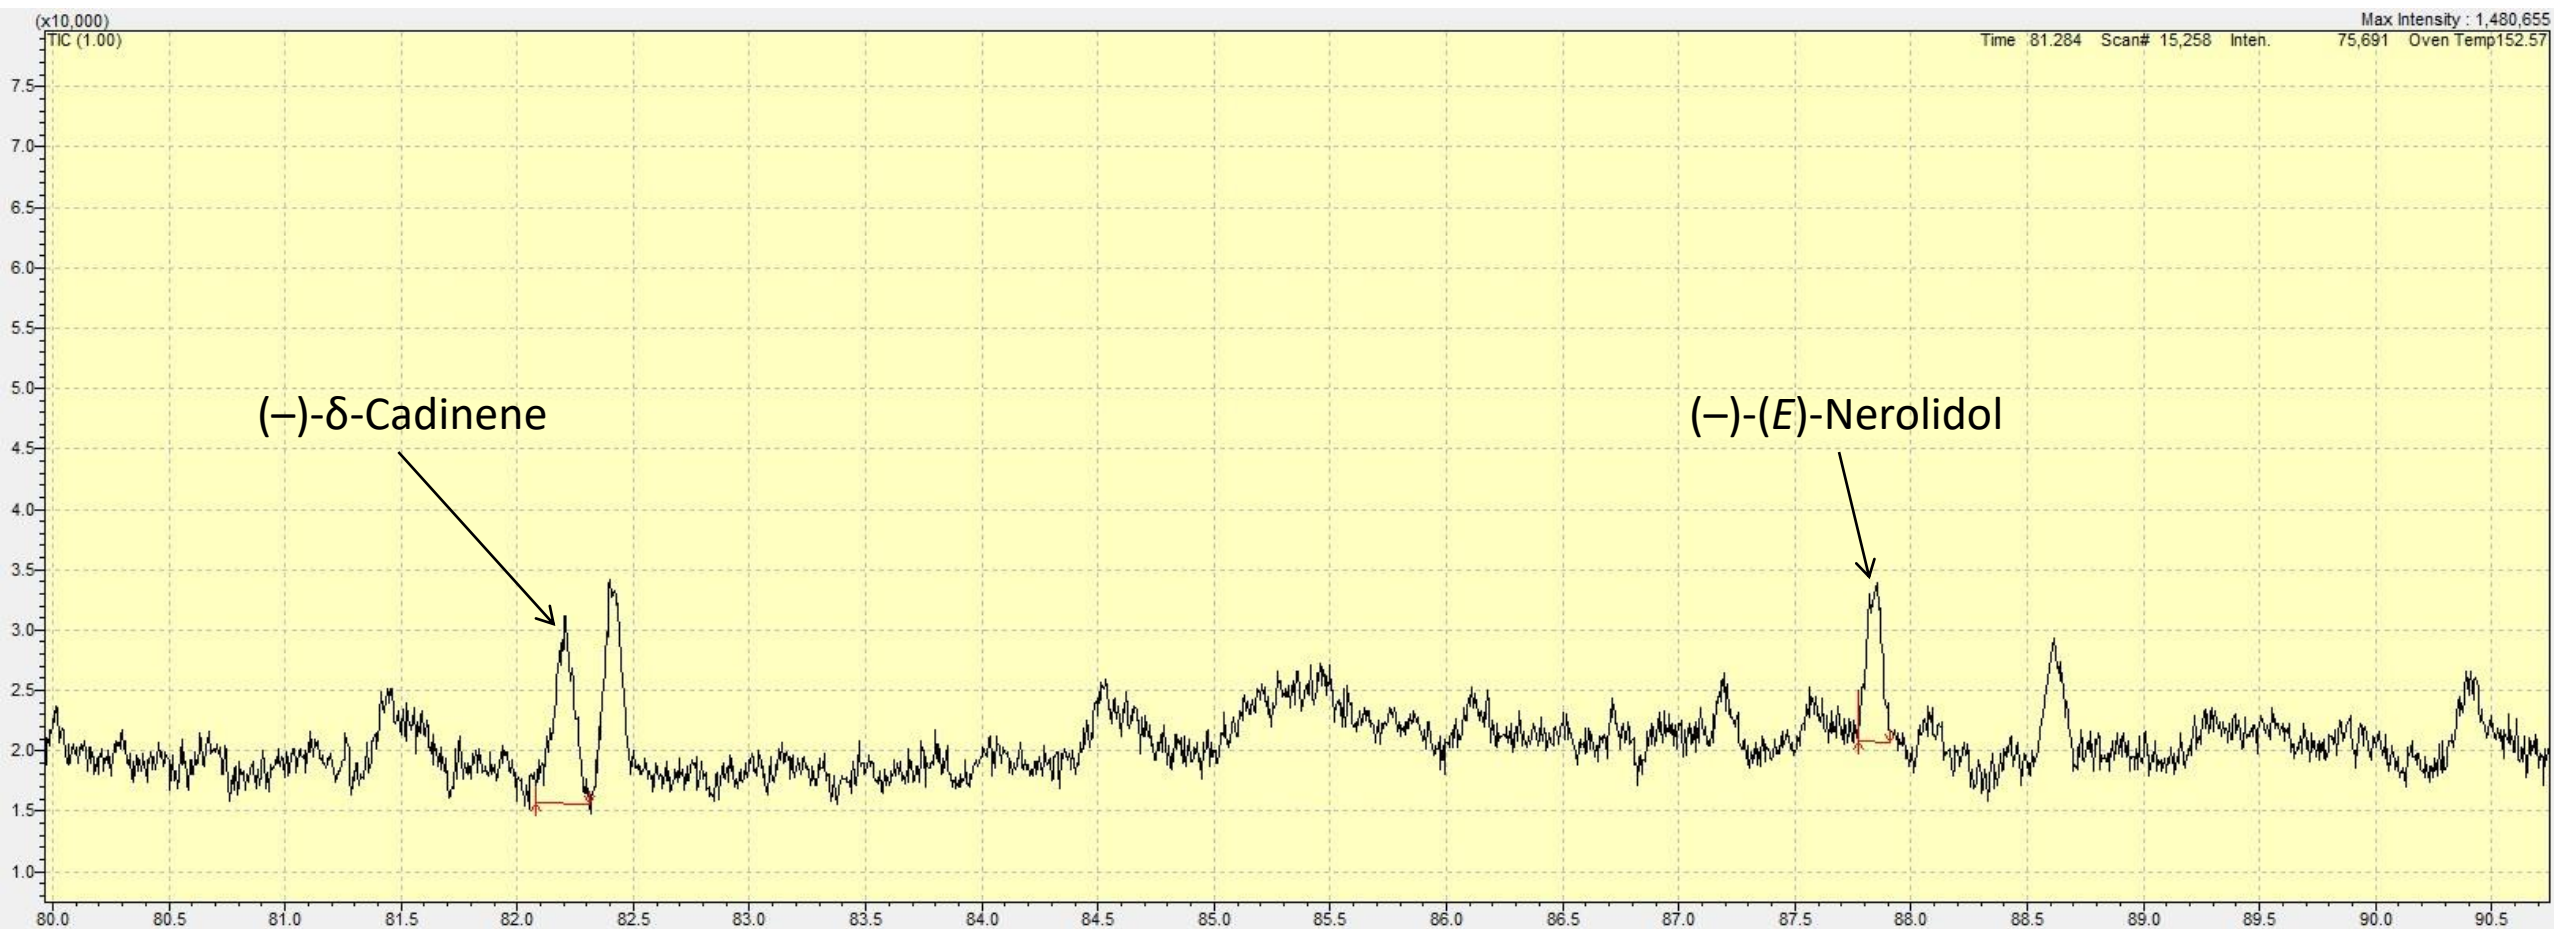

Supplement: s1 [file s1]

**Supplementary Figure S6.** Chiral gas chromatogram of *Smallanthus uvedalia* essential oil.

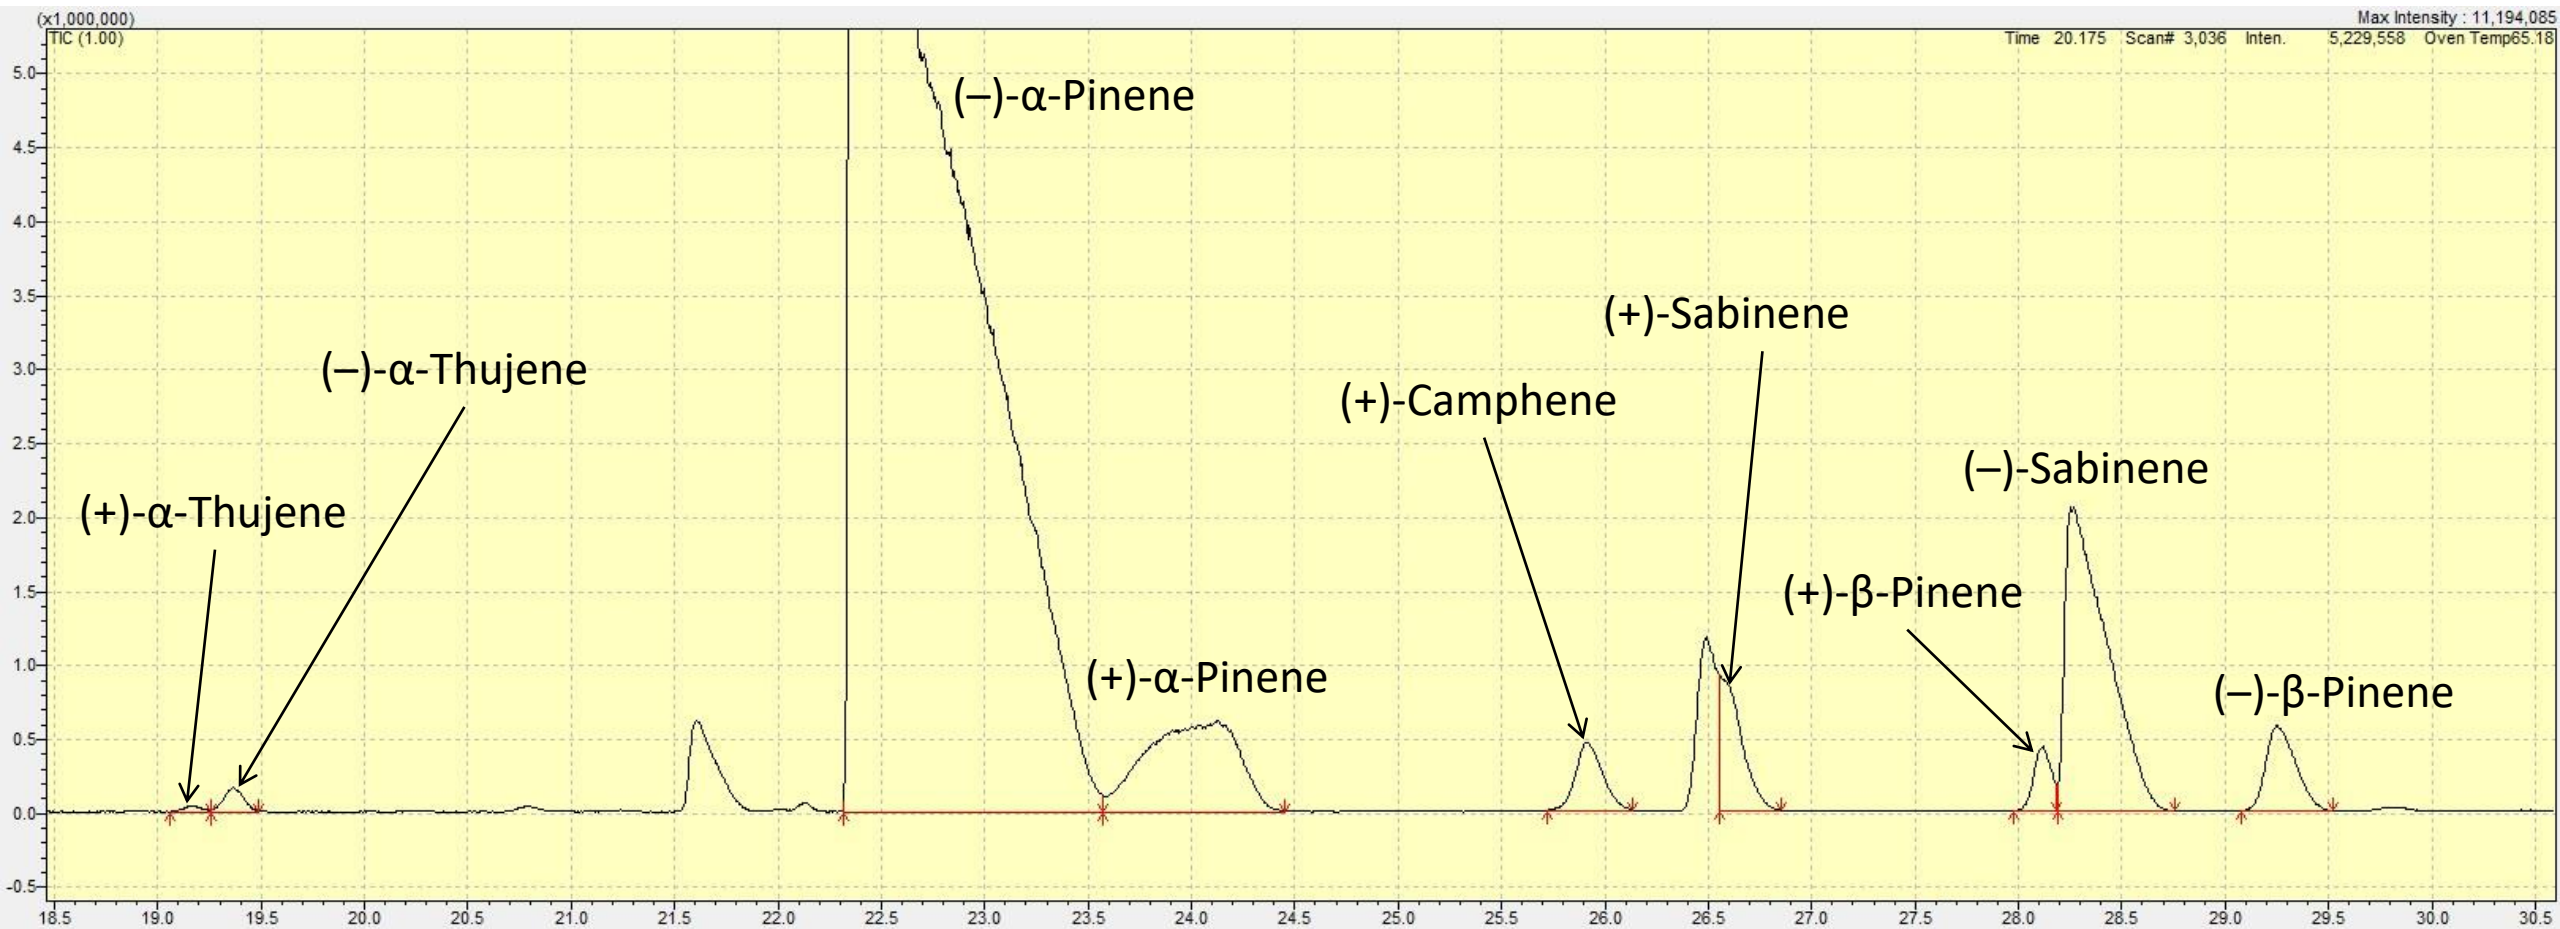

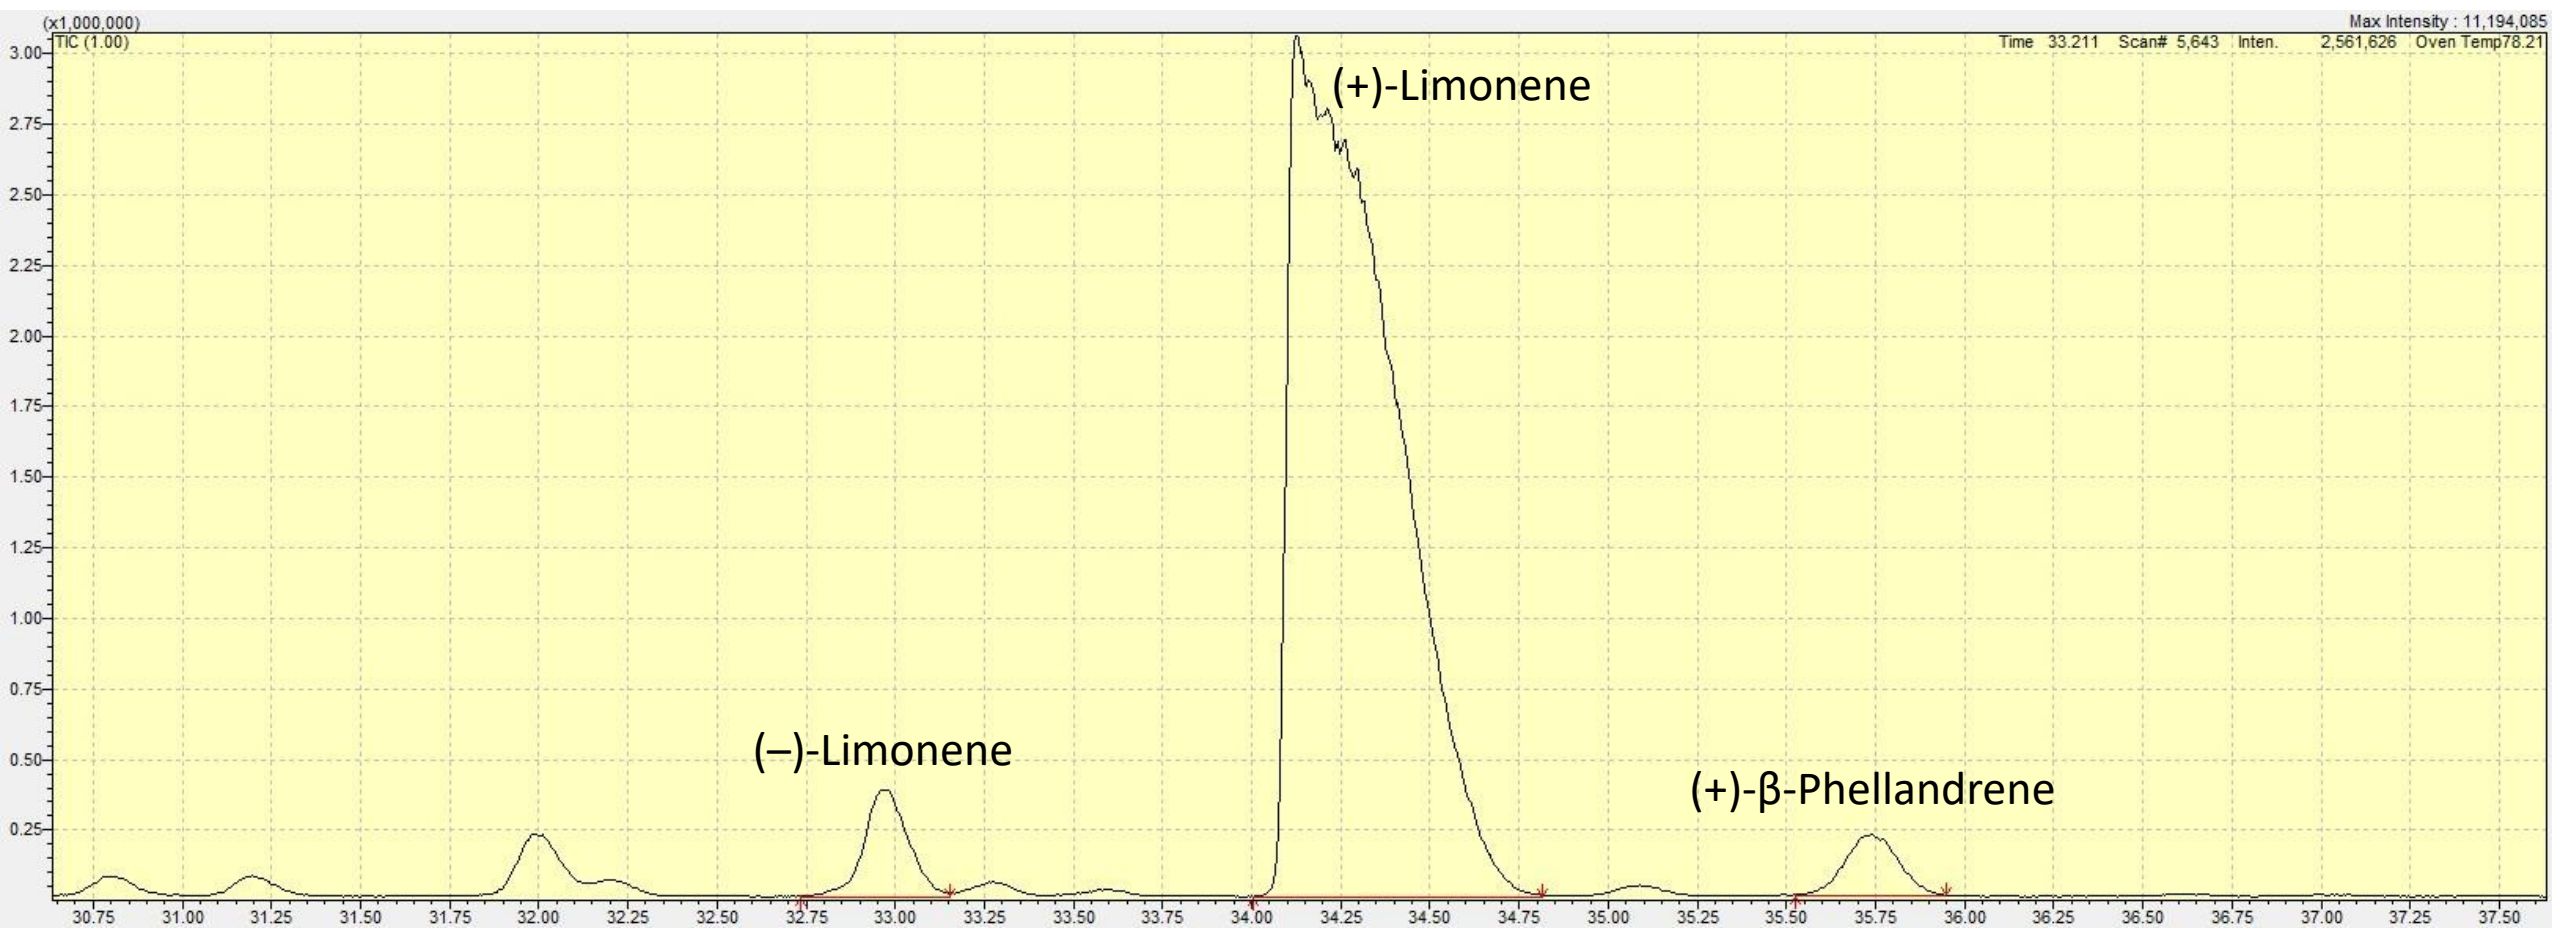

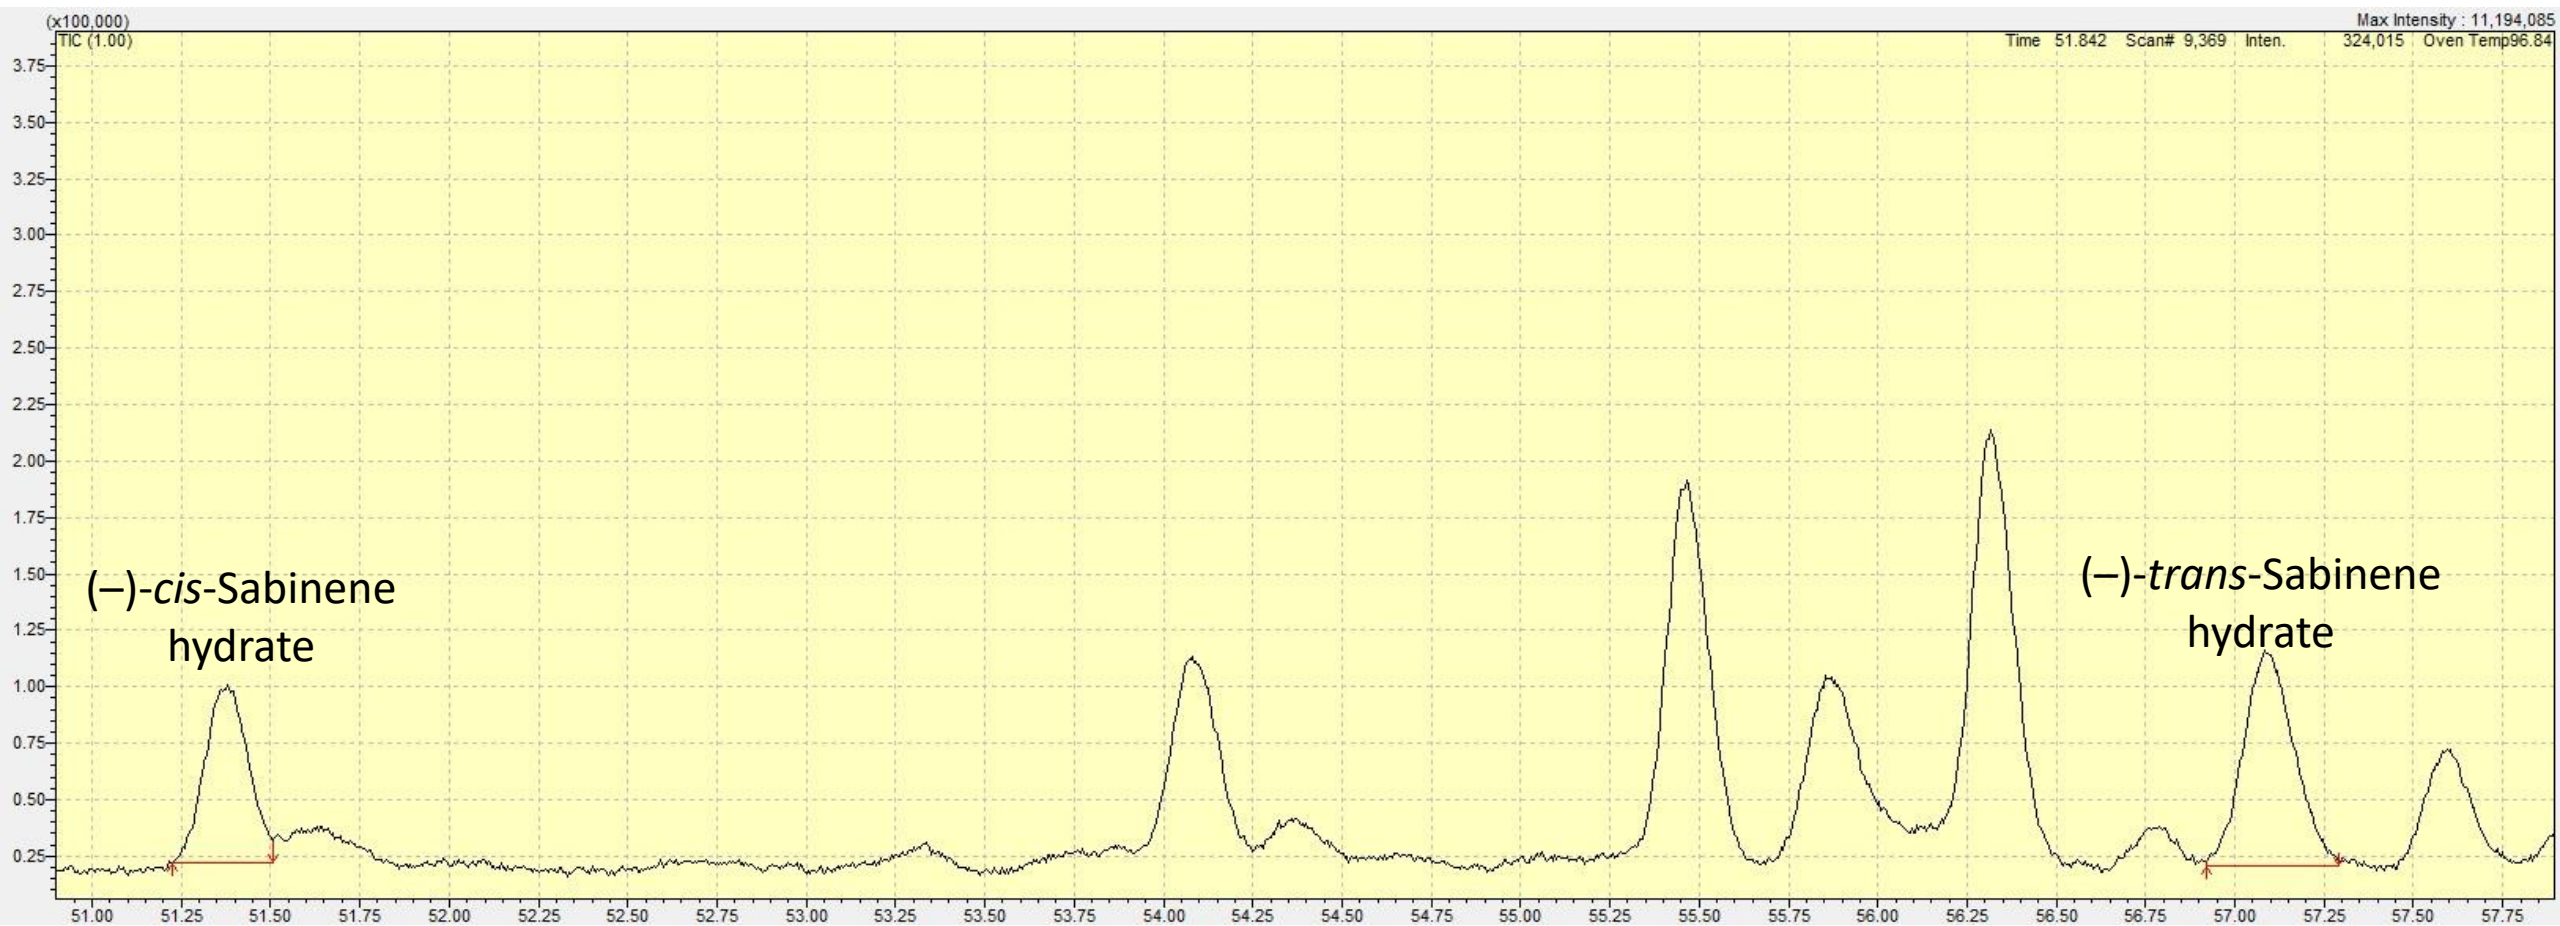



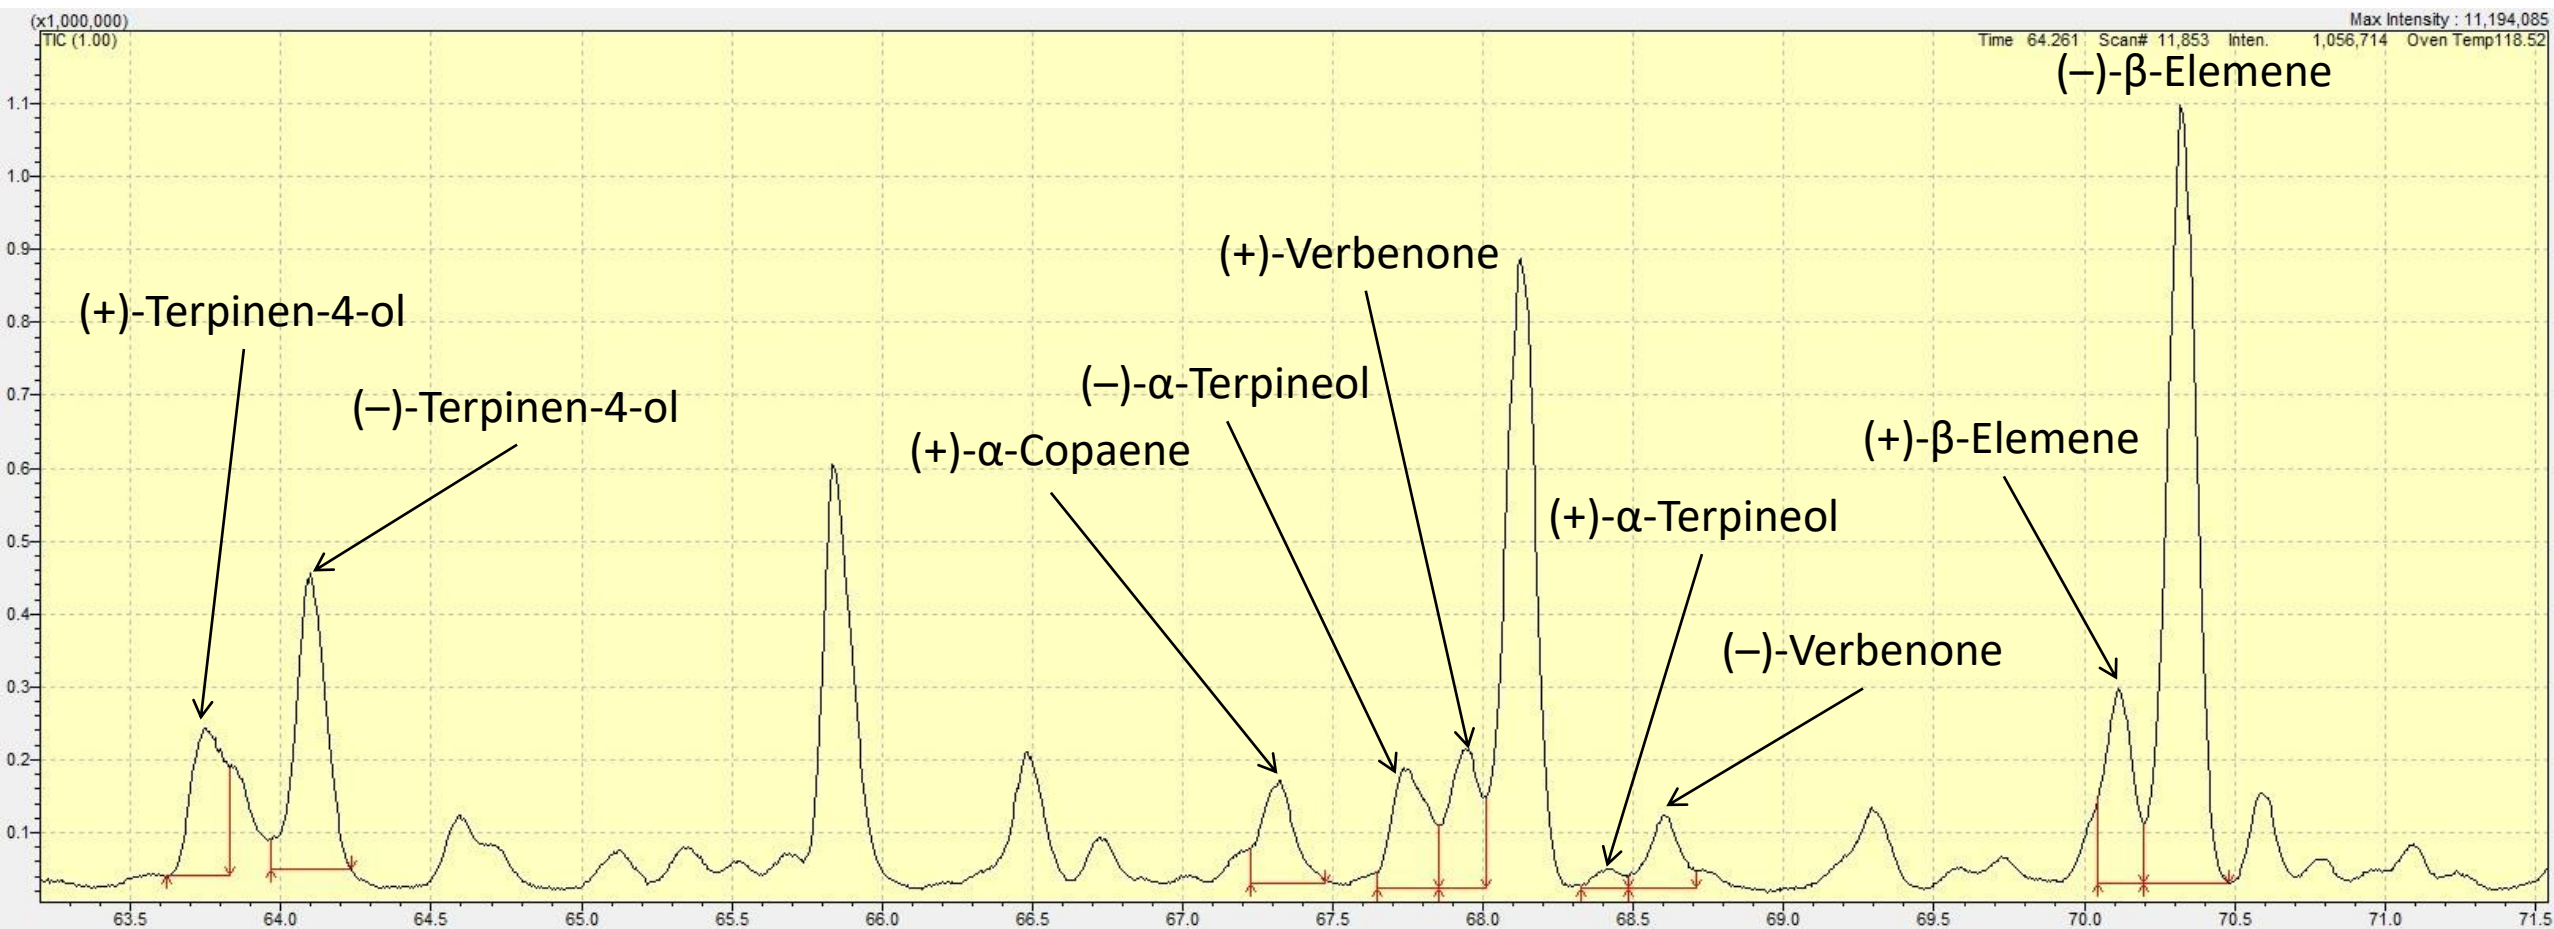

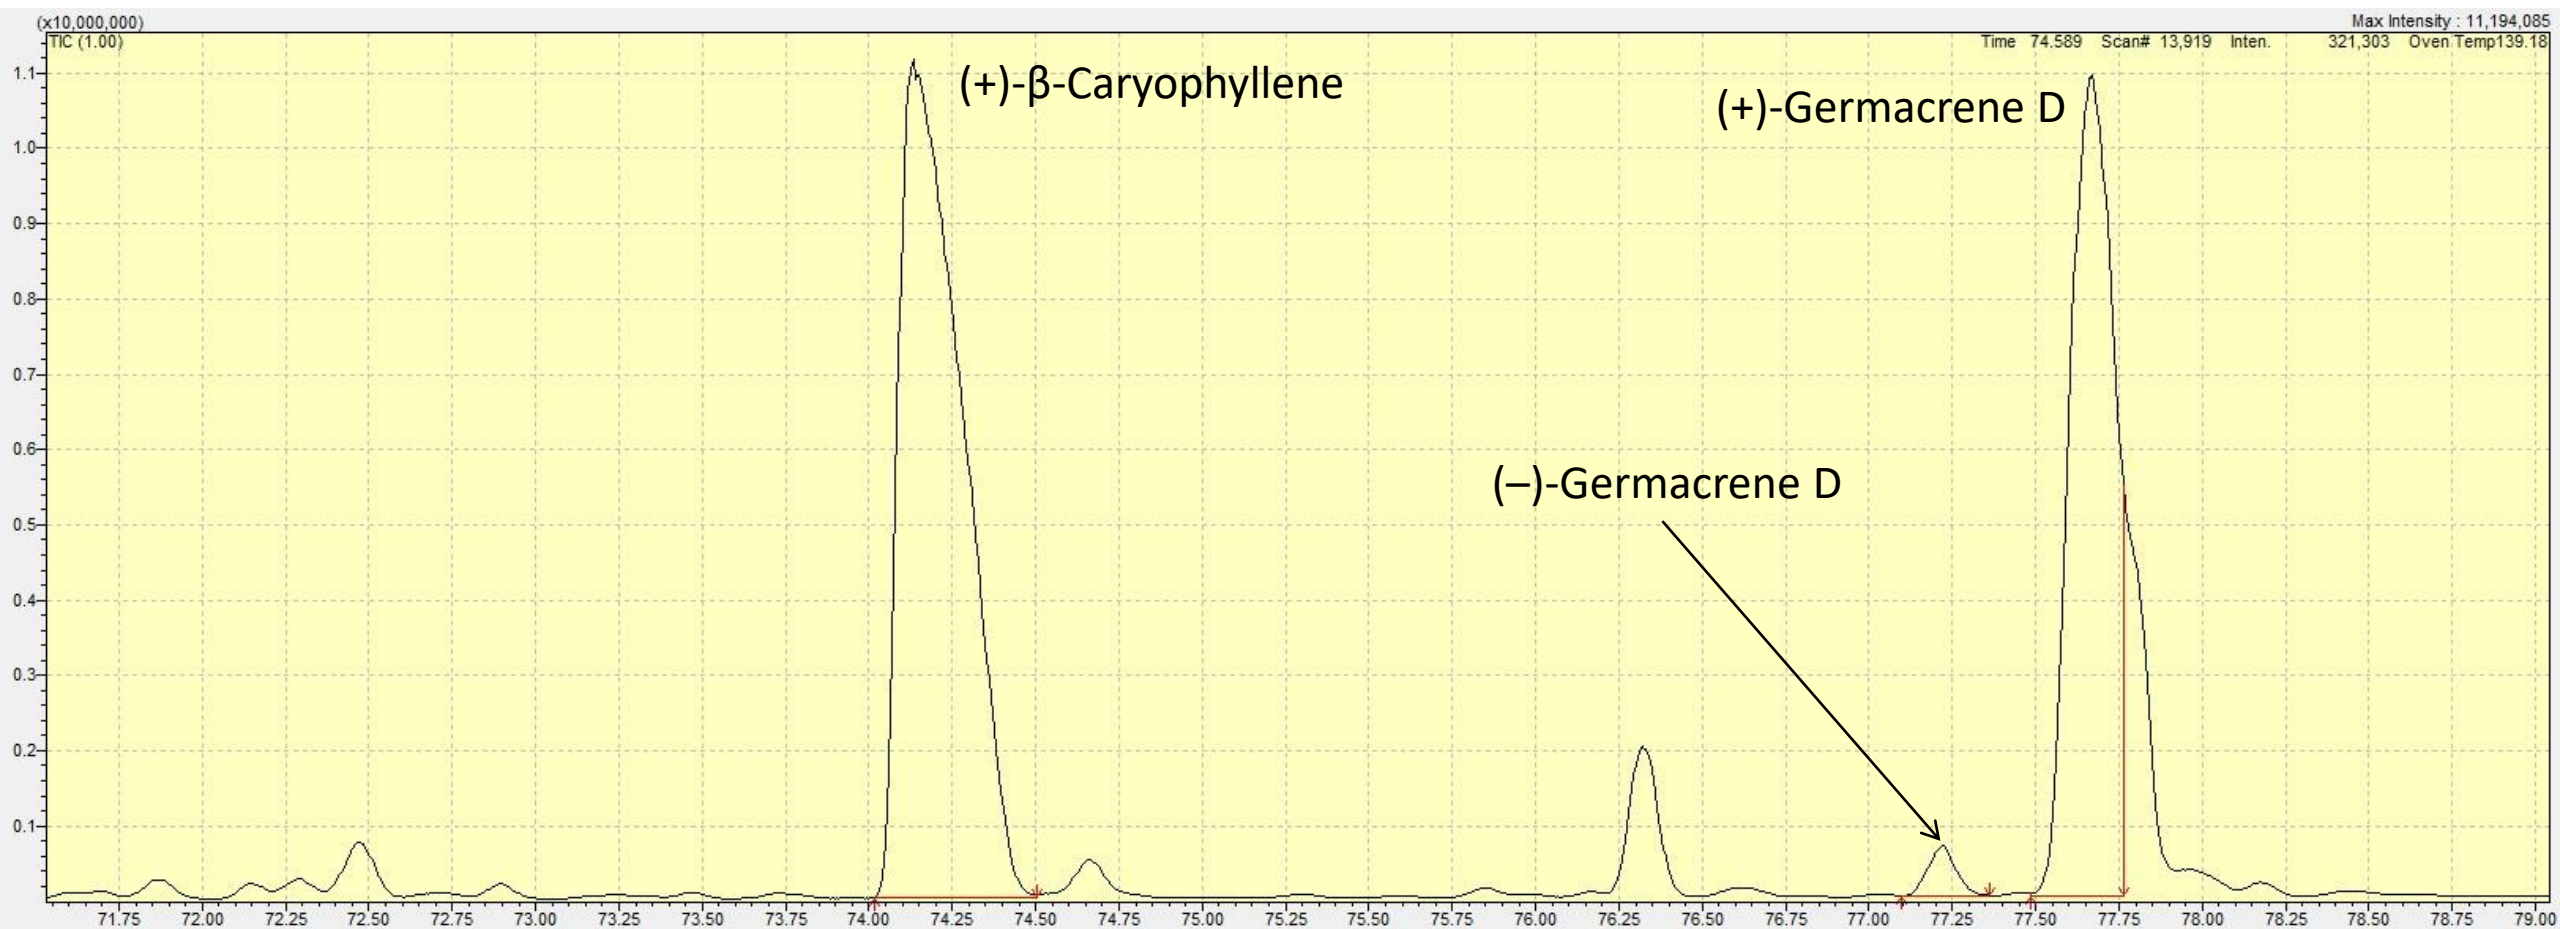

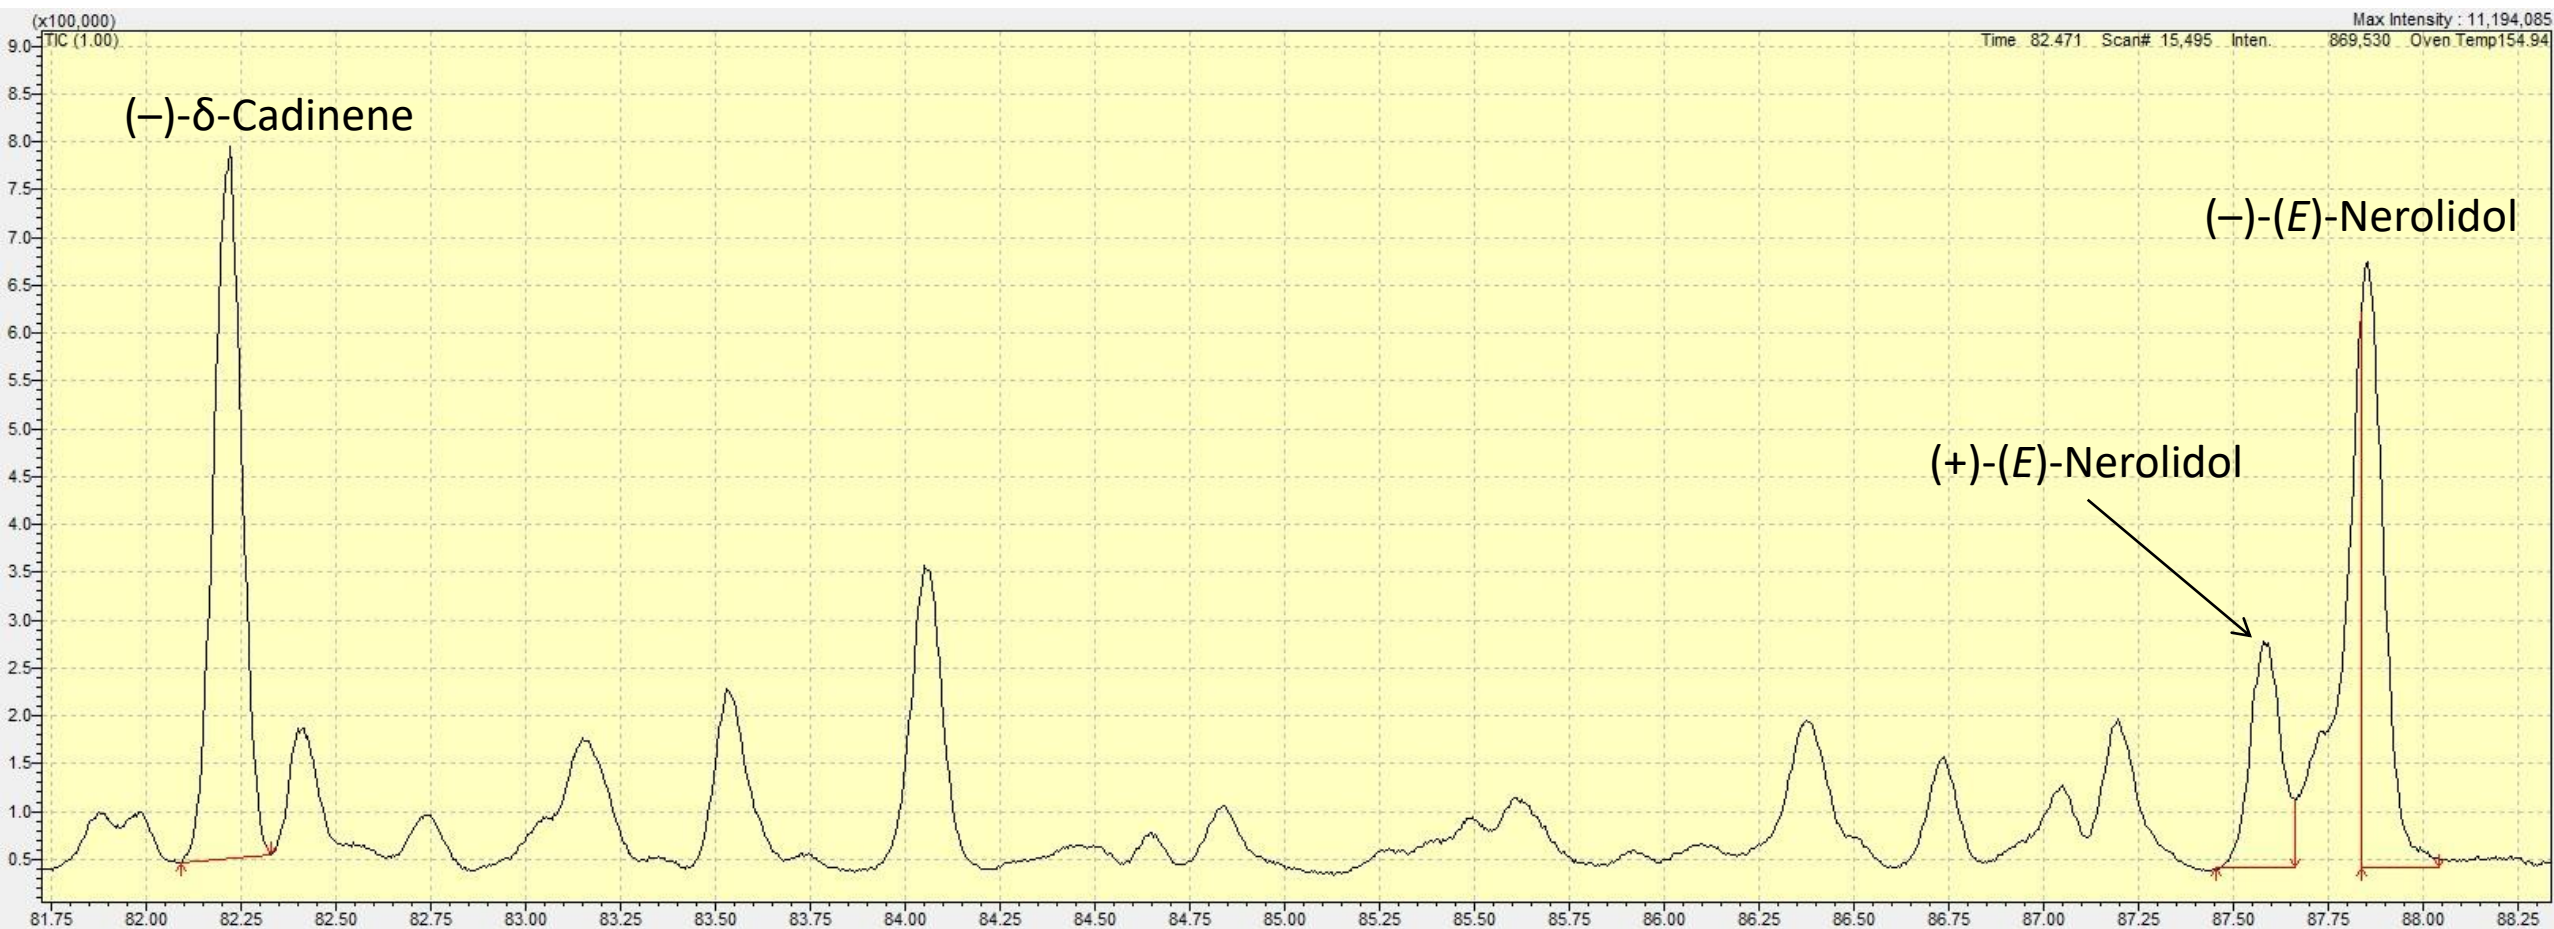

Supplement: s1 [file s1]

**Supplementary Figure S3.** Chiral gas chromatogram of *Helianthus helianthoides* essential oil.

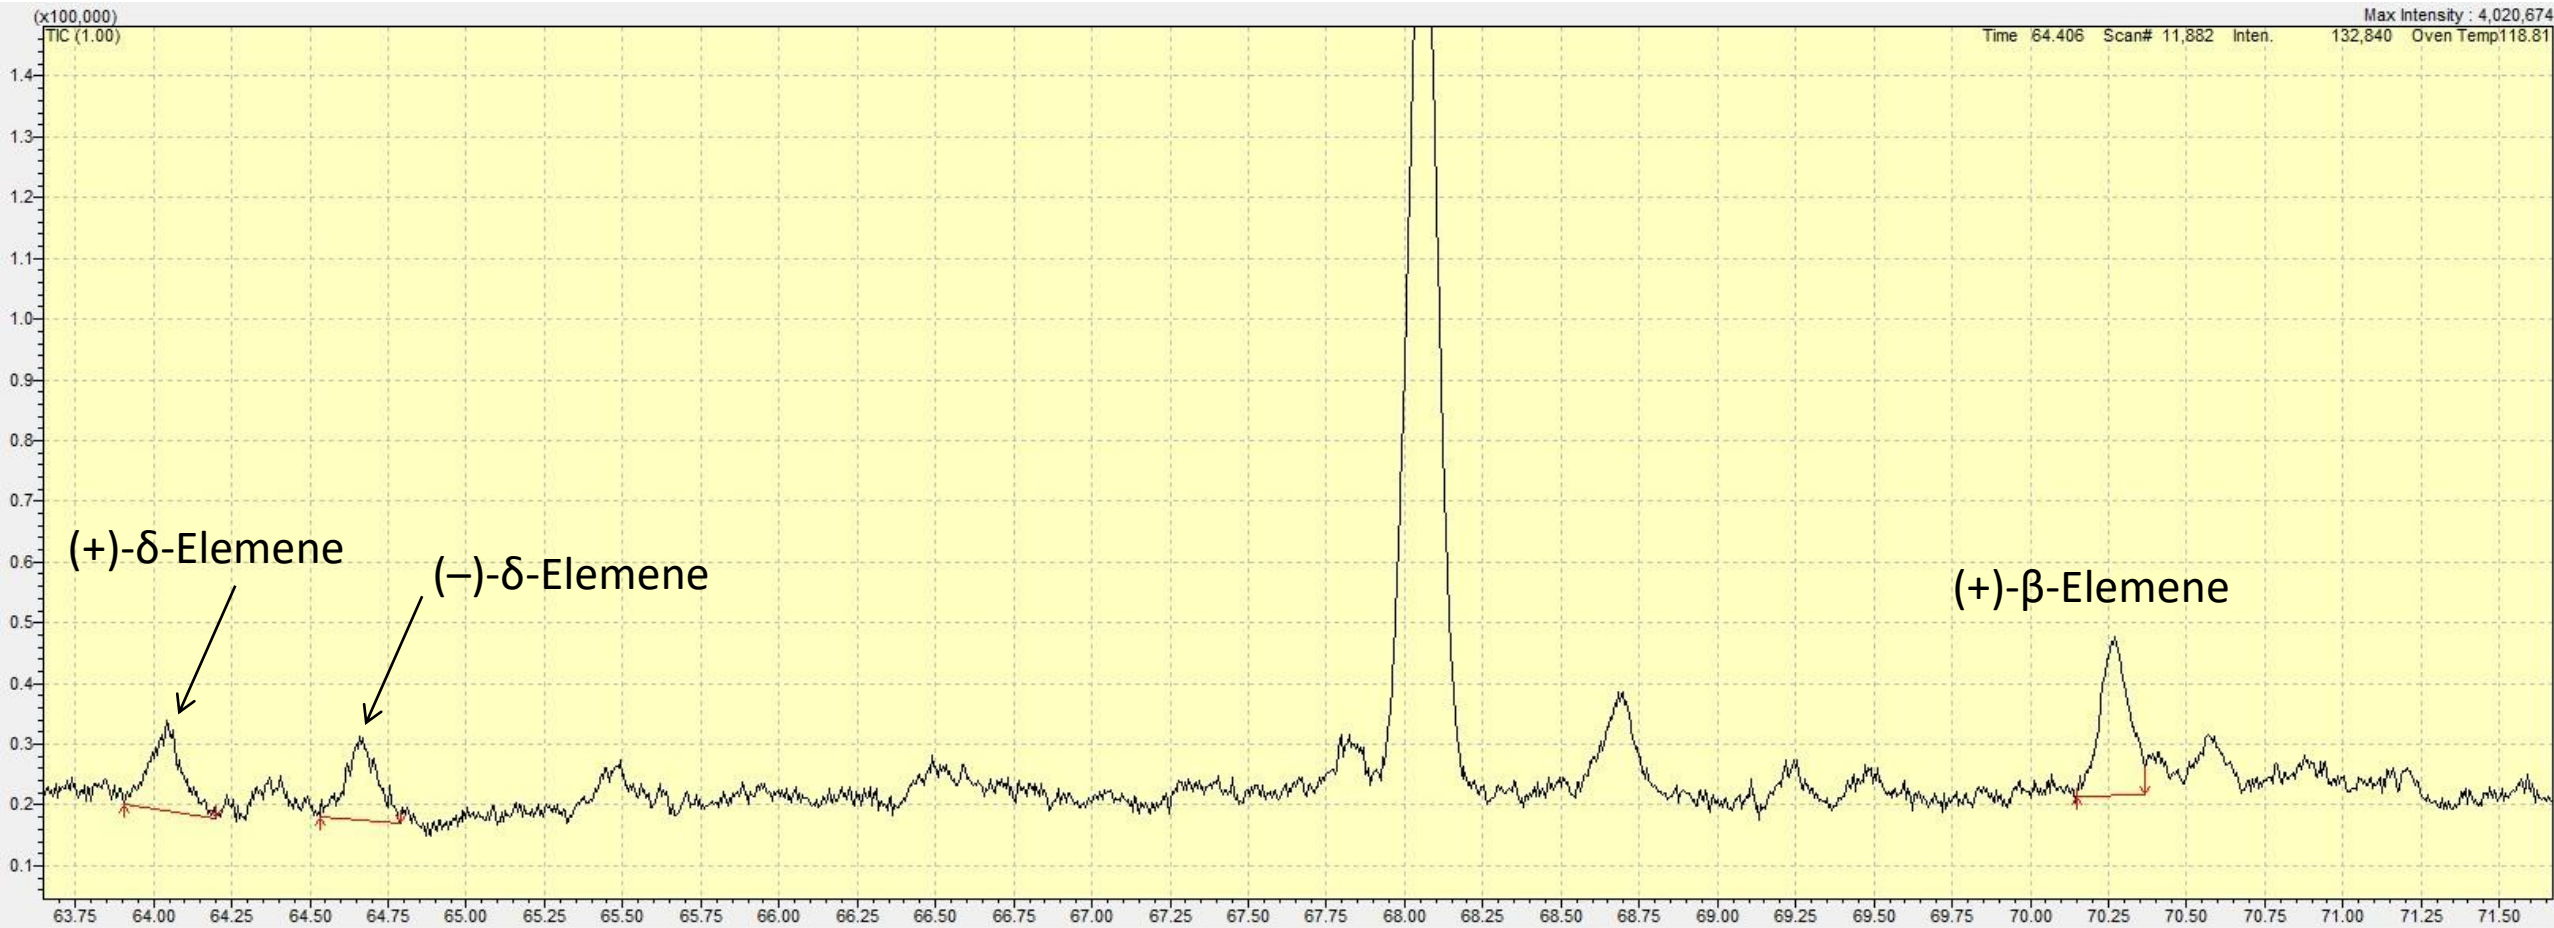

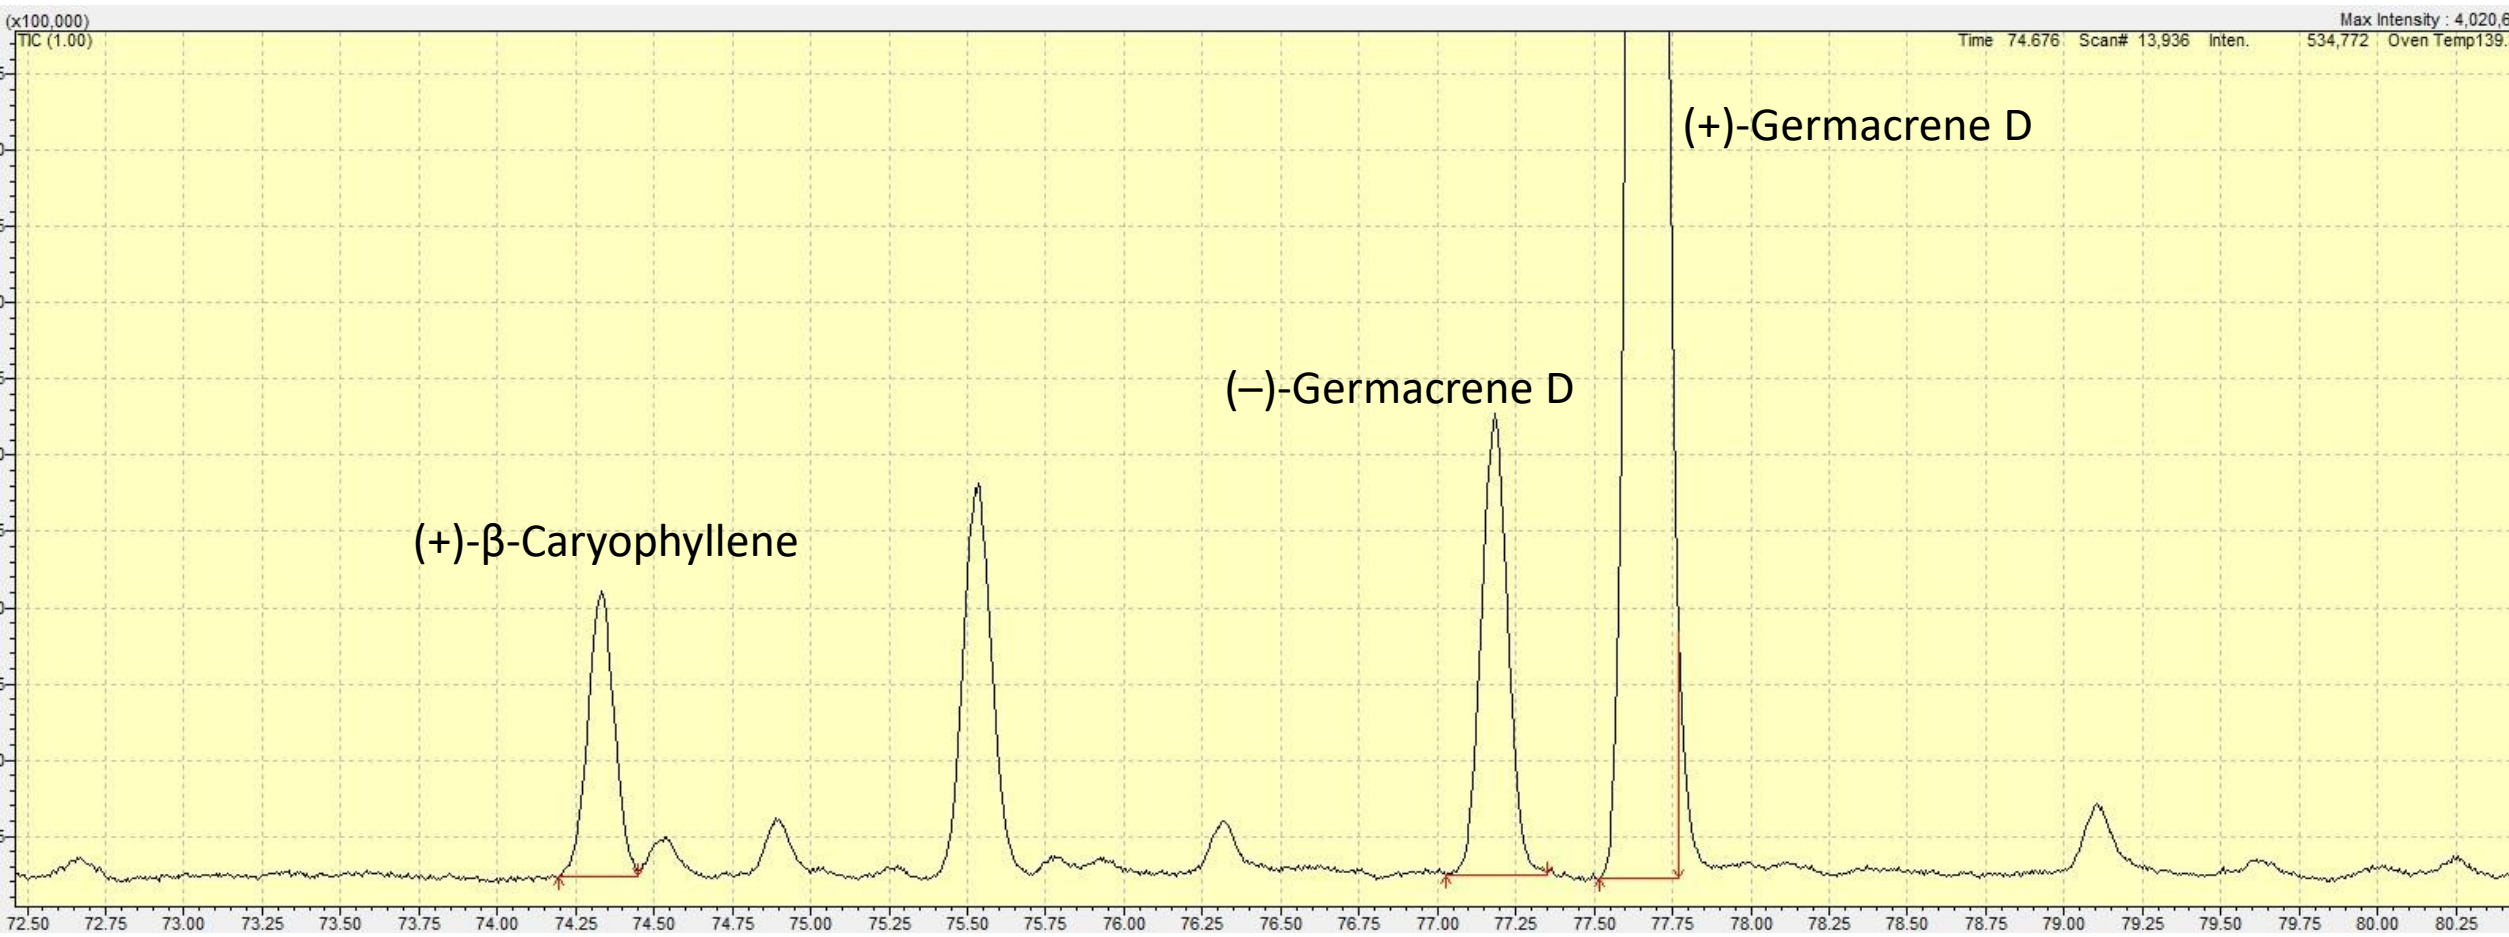

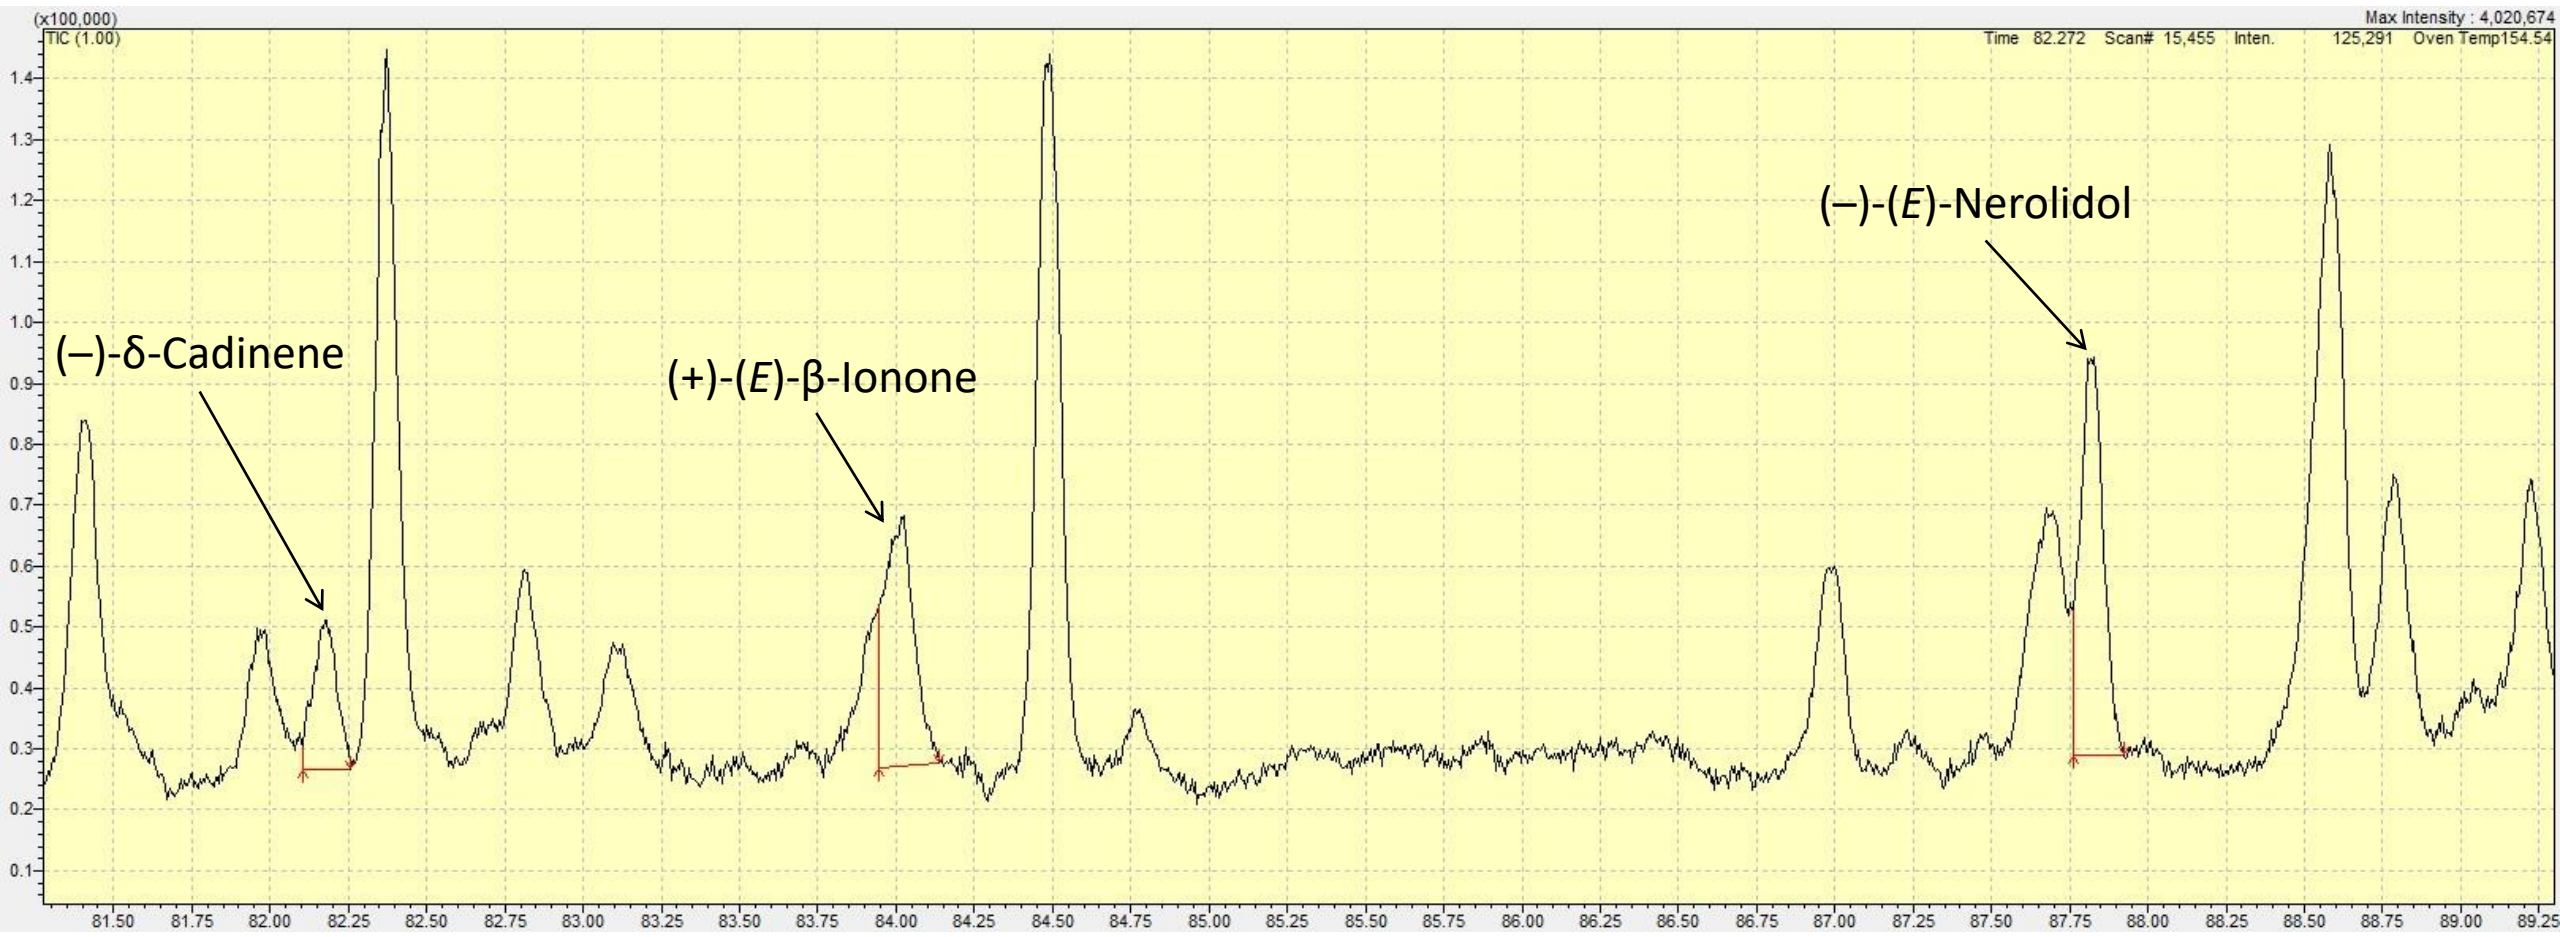

Supplement: s1 [file s1]

**Supplementary Figure S2.** Chiral gas chromatogram of *Gaultheria produmbens* essential oil.

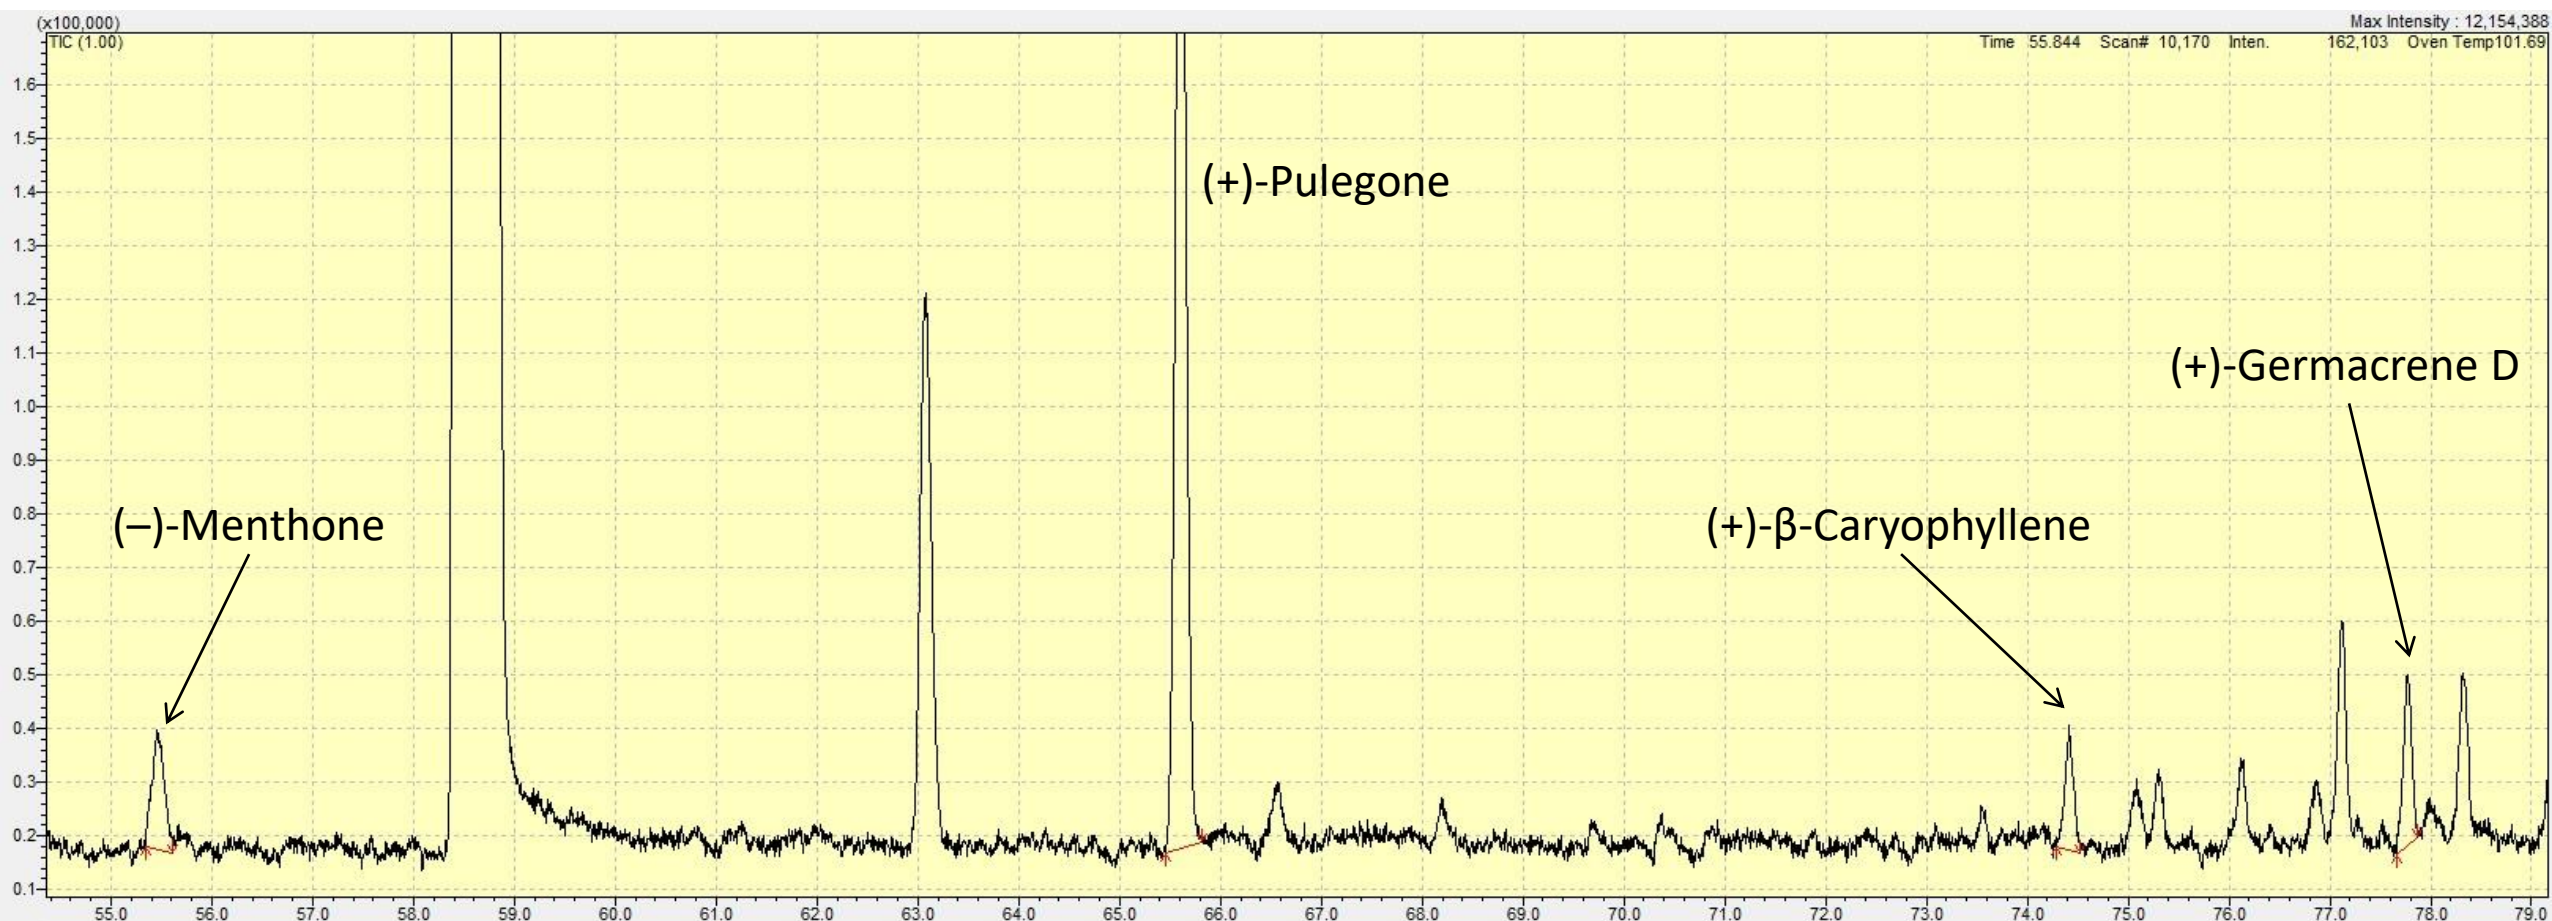

Supplement: s1 [file s1]

**Supplementary Figure S4.** Chiral gas chromatogram of *Liatris spicata* essential oil.

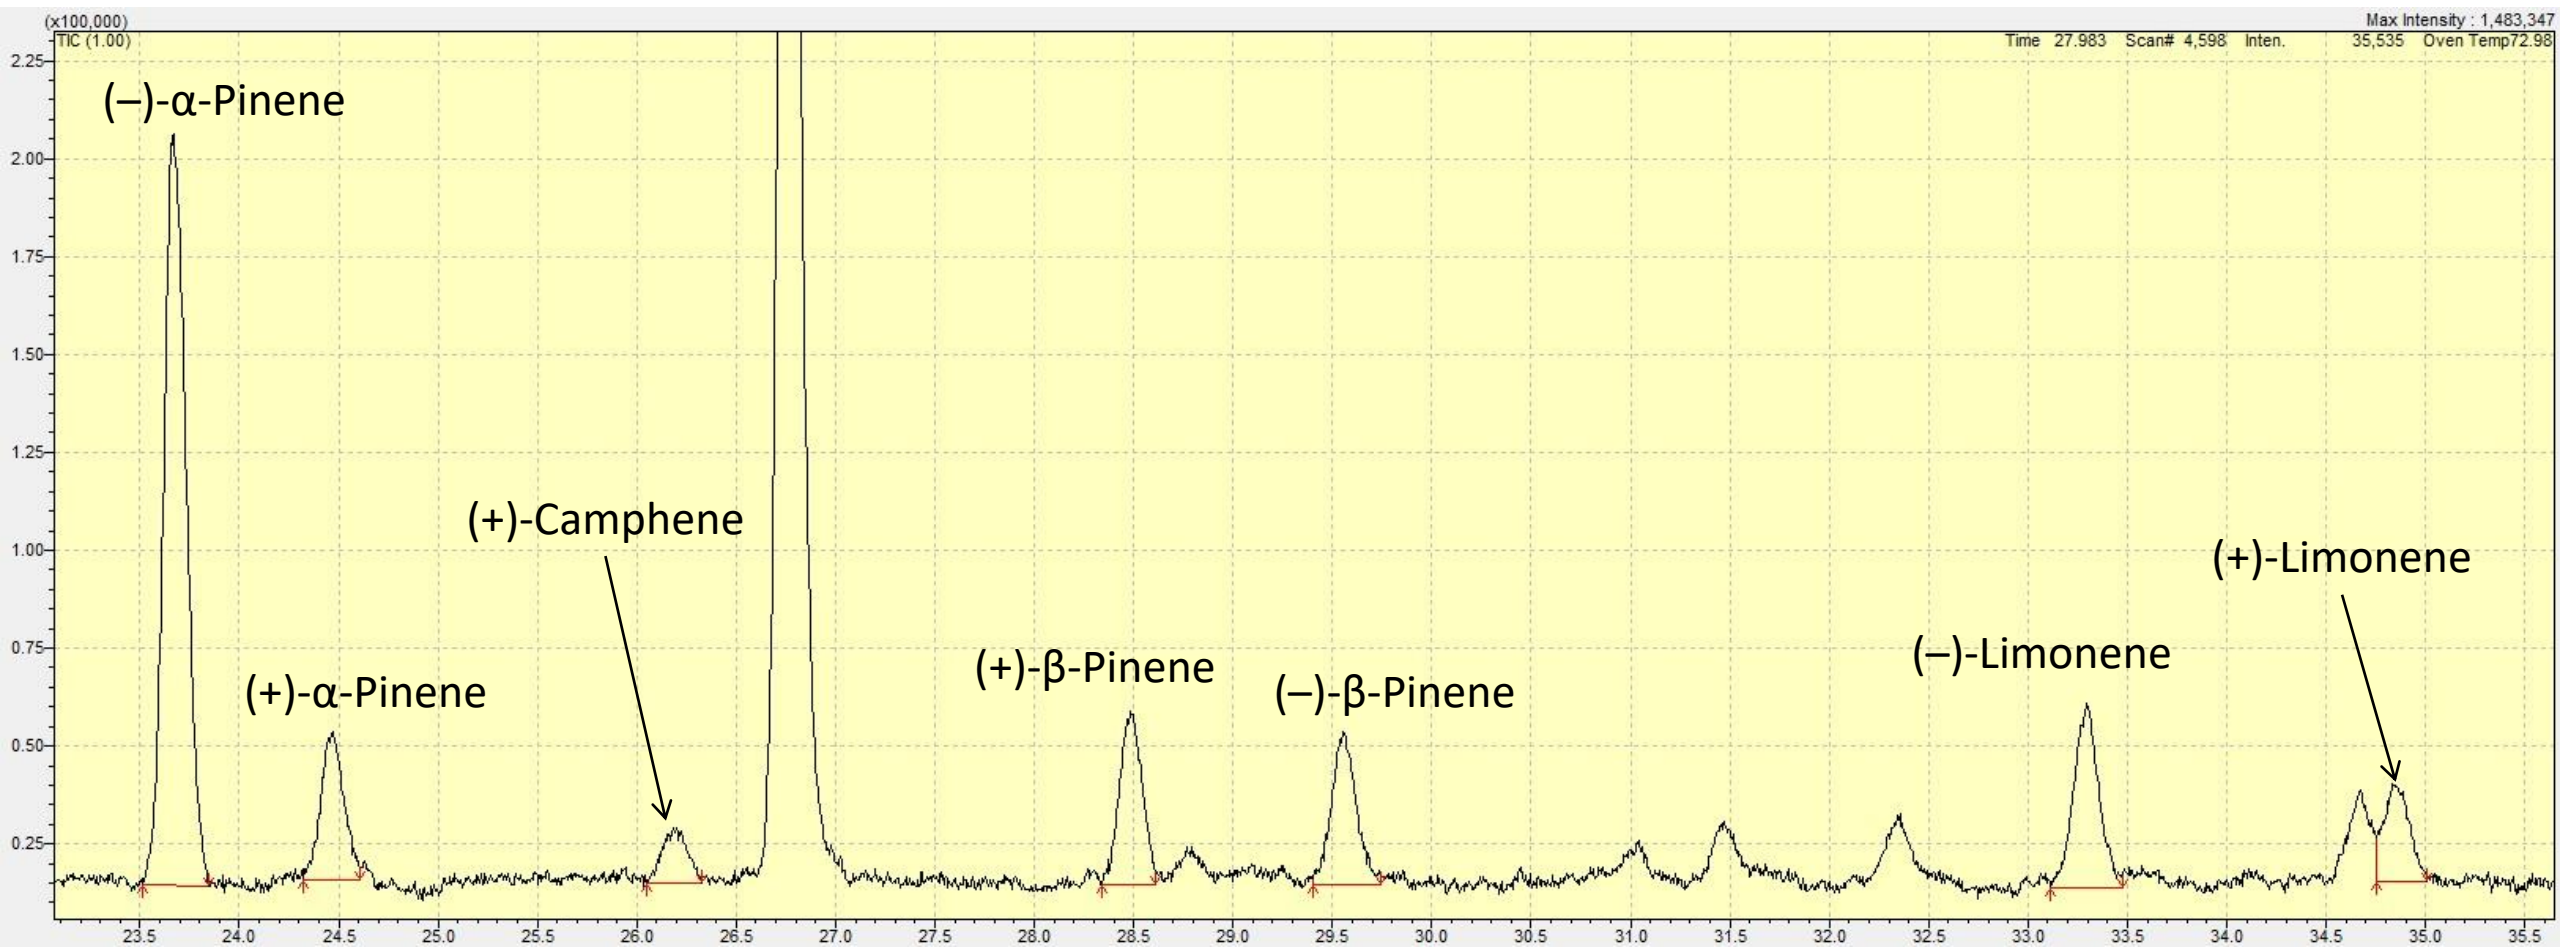

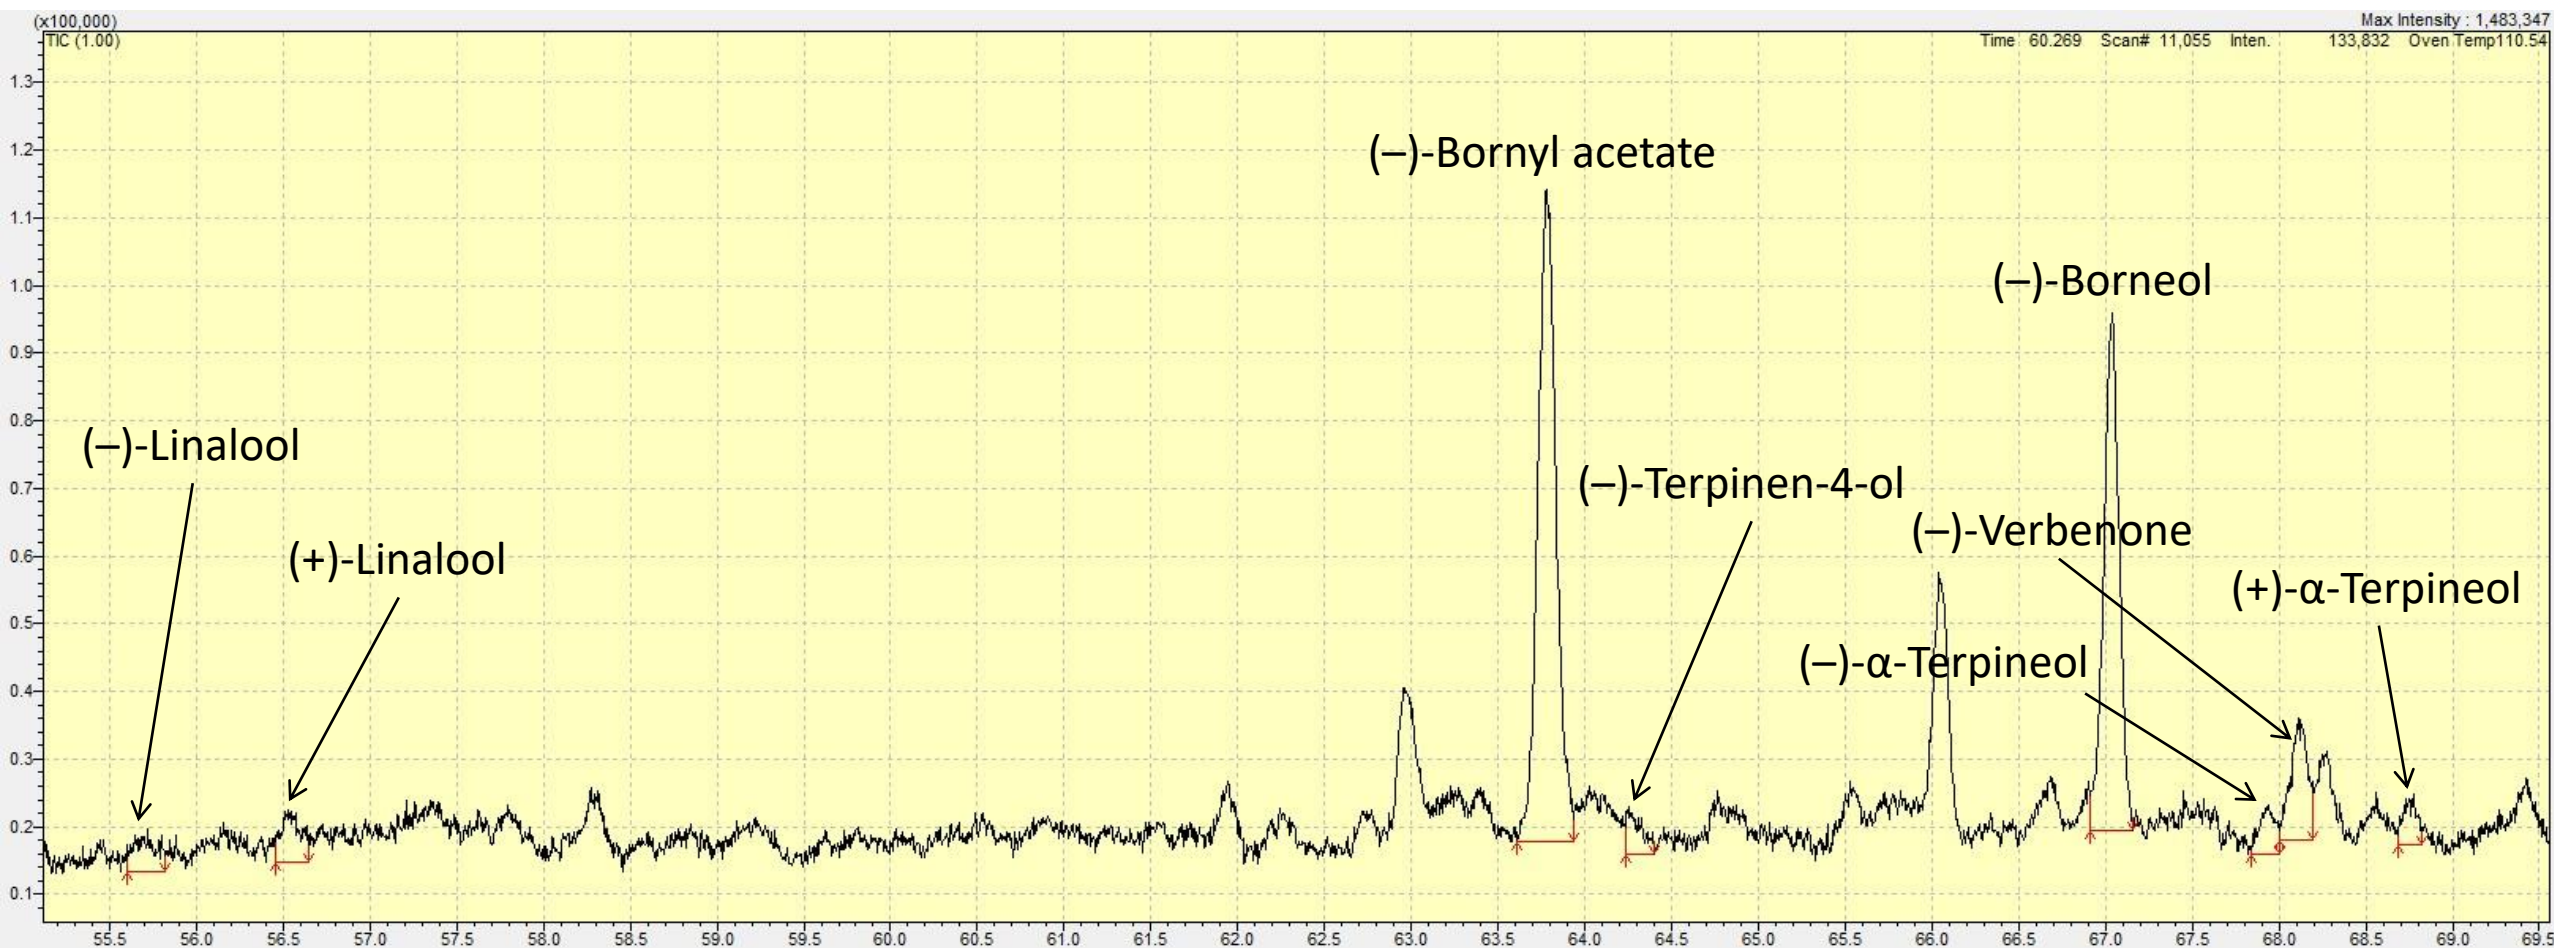

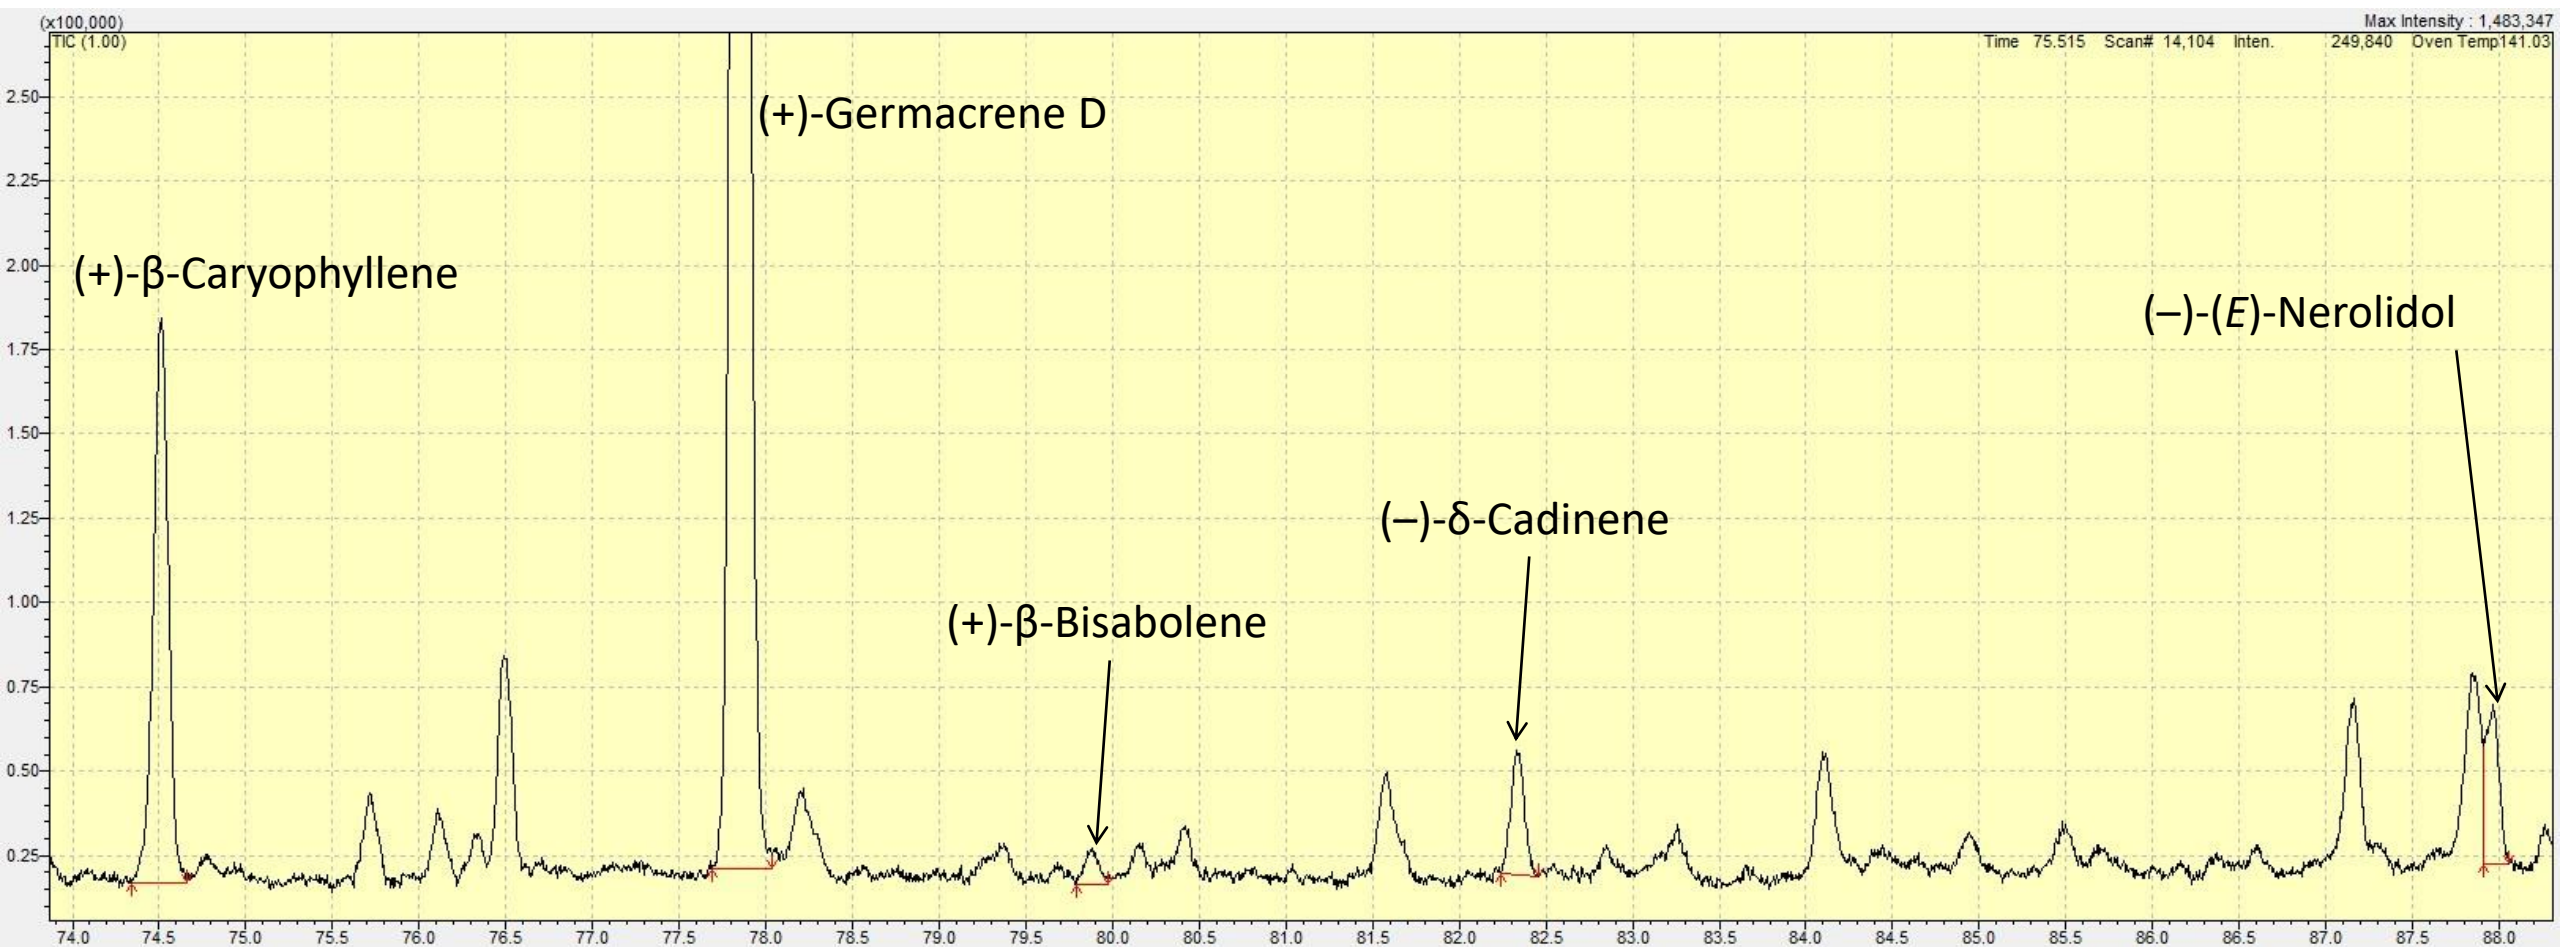

Supplement: s1 [file s1]
